# 1 **Dissecting the import and export pathways of the human RNA helicase UPF1**

2

3

4 **Andrea B. Eberle<sup>1</sup>, Karin Schranz<sup>1</sup>, Sofia Nasif<sup>1</sup>, Lena Grollmus<sup>1,2</sup> and Oliver Mühlemann<sup>1#</sup>**

5

6 <sup>1</sup> Department of Chemistry, Biochemistry and Pharmaceutical Sciences, University of Bern, Freiestrasse  
7 3, 3012 Bern, Switzerland

8 <sup>2</sup> Present address: School of Life Sciences, EPFL, Station 19, 1015 Lausanne, Switzerland

9

10 #Corresponding author: [oliver.muehlemann@dcb.unibe.ch](mailto:oliver.muehlemann@dcb.unibe.ch)

11

12 **Keywords:** UPF1, NMD, RNA helicase, NES, NLS

13

## 14 **Abstract**

15 **The RNA helicase UPF1 is best known for its key role in mRNA surveillance but has been implicated**  
16 **in additional cellular processes both in the nucleus and in the cytoplasm. In human cells, the vast**  
17 **majority of UPF1 resides in the cytoplasm and only small amounts can be detected in the nucleus at**  
18 **steady state. It was previously shown that its export from the nucleus to the cytoplasm is Crm1-**  
19 **dependent, yet neither the nuclear export signal (NES) nor the nuclear localization signal (NLS) has**  
20 **been identified. Here, we provide evidence for a noncanonical NLS in UPF1, map the NES to amino**  
21 **acids 89-105 and show that L103 and F105 are essential for UPF1's export to the cytoplasm.**  
22 **Examination of additional UPF1 mutants revealed that a functional helicase domain but not the**  
23 **association with RNA is crucial for the shuttling capacity of UPF1.**

24

25

## 26 Introduction

27 From its transcription in the cell nucleus to its translation in the cytoplasm messenger  
28 ribonucleoparticles (mRNPs), which consist of mRNA and all proteins bound to it, undergo constant  
29 remodelling with various RNA-binding proteins (RBPs) leaving and joining the mRNP (Singh et al.,  
30 2015). These remodelling events alter the overall structure of the mRNP and thereby have important  
31 regulatory impact on mRNA synthesis, processing, localization, translation, and stability, and hence on  
32 the expression of the genetic information. RNA helicases play key roles in these energy-dependent  
33 mRNP remodelling steps and therefore exert crucial functions in post-transcriptional gene expression  
34 (Jankowsky, 2011).

35 Up-frameshift 1 (UPF1) is an abundant ATP-dependent RNA helicase belonging to the non-ring forming  
36 superfamily (SF) 1 of eukaryotic RNA helicases, which contain a conserved helicase core that consists  
37 of two RecA-like domains. The two RecA-like domains form the ATP-binding pocket and a composite  
38 RNA-binding surface (Chakrabarti et al., 2011; Cheng et al., 2007; Gowravaram et al., 2018). Driven by  
39 ATP hydrolysis, UPF1 unwinds both RNA and DNA in a highly processive manner and translocates on  
40 nucleic acid in 5' to 3' direction (Fiorini et al., 2015). The helicase domain (HD) of UPF1 is flanked N-  
41 terminally by a cysteine-histidine rich (CH) domain and at the C-terminus by an unstructured stretch  
42 of amino acids enriched in serine-glutamine (SQ) motifs (Figure 1A), both of which were shown to  
43 suppress the catalytic activity of UPF1 (Chamieh et al., 2008; Fiorini et al., 2013).

44 With about 360'000 molecules per cell, human cells contain roughly the same amount of UPF1  
45 molecules as mRNA molecules (Hein et al., 2015). UPF1 is an essential protein in mammalian cells:  
46 UPF1 knockout is embryonic lethal (Medghalchi et al., 2001) and immortalized cells stop dividing and  
47 die about 5-7 days after UPF1 depletion (Azzalin and Lingner, 2006). UPF1 has been implicated in  
48 several different cellular processes among which its key role in nonsense-mediated mRNA decay  
49 (NMD) is best characterized (Karousis and Muhlemann, 2019; Kim and Maquat, 2019). Besides its  
50 essential role in NMD (see below), UPF1 has been associated with additional mRNA decay pathways  
51 that are specified by different UPF1-interacting RBPs, such as Staufen [STAU; (Kim et al., 2005; Park  
52 and Maquat, 2013)], stemloop-binding protein [SLBP; (Choe et al., 2014; Kaygun and Marzluff, 2005)],  
53 glucocorticoid receptor [GR; (Cho et al., 2015; Park et al., 2016)], regnase 1 (Mino et al., 2015), and in  
54 tudor staphylococcal/micrococcal-like nuclease (TSN)-mediated microRNA decay (Elbarbary et al.,  
55 2017).

56 NMD serves a dual role as a mRNA quality control mechanism that targets for degradation aberrant  
57 mRNAs with a premature termination codon (PTC), which most frequently arise due to the inclusion  
58 or exclusion of an alternative exons (Karousis et al., 2021), and as a translation-dependent post-

59 transcriptional regulator of mRNA stability for a subset of mRNAs that encode full length functional  
60 proteins (Karousis and Muhlemann, 2019; Kurosaki et al., 2019). The molecular mechanism of NMD,  
61 in particular the step of target mRNA selection, is still incompletely understood but it is well established  
62 that UPF1 is essential for NMD in all eukaryotes (Karousis and Muhlemann, 2019; Kurosaki *et al.*, 2019).  
63 Cross-linking followed by immunoprecipitation (CLIP) studies detected UPF1 binding to essentially all  
64 mRNAs at many different sites over their entire length before the onset of translation, followed by a  
65 translation-dependent displacement from coding sequences, resulting in an enrichment on 3'  
66 untranslated regions (UTRs) at cellular steady state (Hurt et al., 2013; Zund et al., 2013). On mRNAs on  
67 which ribosomes fail to terminate translation correctly (Karousis and Muhlemann, 2019), SMG1-  
68 mediated phosphorylation of serine and threonine of the serine/glutamine (SQ) and  
69 threonine/glutamine (TQ) motifs in the N- and C-terminal parts of UPF1 is observed (Durand et al.,  
70 2016; Kurosaki and Maquat, 2013; Lee et al., 2015; Yamashita et al., 2001), which appears to be the  
71 activating step in NMD. Hyperphosphorylated UPF1 then recruits the downstream effectors SMG5,  
72 SMG6 and SMG7, of which SMG6 is an endonuclease that induces the degradation of the targeted  
73 mRNA by cleaving it in the vicinity of the termination codon (Boehm et al., 2021; Eberle et al., 2009;  
74 Huntzinger et al., 2008; Lykke-Andersen et al., 2014).

75 Moreover, there is also evidence that UPF1 exerts different functions in the nucleus that contribute to  
76 genome stability (DNA damage response and R-loop formation) and the regulation of S-phase  
77 progression (Azzalin and Lingner, 2006; Dehghani-Tafti and Sanders, 2017; Ngo et al., 2021), as well as  
78 to the regulation of telomeric repeat-containing RNA (TERRA) and telomere replication (Azzalin et al.,  
79 2007; Chawla et al., 2011). In addition, UPF1 has been implicated in the nuclear export of HIV-1  
80 genomic RNA (Ajamian et al., 2015) and data from *Drosophila* cells indicates that UPF1 associates with  
81 mRNAs co-transcriptionally and that it is required for their release from the gene loci (Singh et al.,  
82 2019).

83 Although most UPF1 is found in the cytoplasm of human cells under physiological conditions, in  
84 accordance with its translation-dependent function in NMD, a fraction of UPF1 can be detected in the  
85 nucleus of human cells (Ajamian *et al.*, 2015; Hong et al., 2019; Mendell et al., 2002). In fact, UPF1  
86 appears to be a shuttling protein and nuclear accumulation can be triggered by addition of leptomycin  
87 B (LMB) (Mendell *et al.*, 2002), a *Streptomyces* metabolite that blocks CRM1 (Exportin 1)-dependent  
88 nuclear export by covalently binding to cysteine 528 in the nuclear export signal (NES)-binding region  
89 of CRM1 (Rahmani and Dean, 2017). Most proteins that depend on active import into the nucleus via  
90 the nuclear pore complex possess a nuclear localization signal (NLS) that binds to an import receptor  
91 of the importin superfamily. NLSs can consist of very different amino acid sequences but they are  
92 usually rich in positively charged residues (Lu et al., 2021). Classical monopartite NLSs bind to the major

93 binding pocket of the adaptor protein importin  $\alpha$ , while the noncanonical NLSs classes bind the minor  
94 binding pocket of importin  $\alpha$  (Kosugi et al., 2009a). Importin  $\alpha$  then interacts with importin  $\beta$  (aka  
95 karyopherin  $\beta$ 1), which in turn contacts the nuclear pore complex and facilitates translocation of the  
96 cargo/importin complex into the nucleus (Lott and Cingolani, 2011). Alternatively, shuttling proteins  
97 can be directly bound by importin  $\beta$  independent of an adaptor protein (Lee et al., 2006), which makes  
98 computational predictions of NLSs challenging.

99 Here, we set out to functionally delineate the NLS and NES of UPF1. We confirmed that a previously  
100 reported large stretch of about 100 amino acids in the helicase domain of UPF1 is required for its  
101 import into the nucleus (Mendell *et al.*, 2002) but were unable to further map this putative NLS,  
102 suggesting that UPF1 does not contain a NLS that resembles any of the known classes of NLSs (Kosugi  
103 *et al.*, 2009a; Lu *et al.*, 2021). However, we were able to precisely map the NES of UPF1 and identified  
104 two amino acids that when mutated inactivate the NES, resulting in accumulation of UPF1 in the  
105 nucleus. By studying a UPF1 mutant that is unable to bind RNA, we further revealed that the capability  
106 of binding RNA is not required for the import and export of UPF1, however, functional helicase activity  
107 is crucial for its nuclear import.

108

109

## 110 Results

### 111 Both UPF1 isoforms are shuttling proteins localizing mainly to the cytoplasm at steady state

112 UPF1 has been reported to shuttle between the nucleus and the cytoplasm, with the bulk part of the  
113 protein localizing to the cytoplasm at steady state in human and *Drosophila* cells (Lykke-Andersen et  
114 al., 2000; Mendell *et al.*, 2002; Singh *et al.*, 2019). In biochemical fractionation experiments of HeLa  
115 cells, we detected about 7 times less UPF1 in the nuclear fraction than in the cytoplasmic fraction  
116 (Figure 1B). Shuttling proteins typically contain defined amino acids sequences functioning as nuclear  
117 localization signal (NLS) and nuclear export signal (NES). A rough characterization of the NLS and NES  
118 in UPF1, undertaken almost 20 years ago, indicated that the NES resides in the N-terminal part of the  
119 protein somewhere between amino acids 55 and 416, and the NLS lies within the helicase domain  
120 between amino acids 596 and 697 (Figure 1A), since deletions of these regions led to an accumulation  
121 of UPF1 in the nucleus or its failure to localize to the nucleus, respectively (Mendell *et al.*, 2002).  
122 However, in this first characterization large deletions of 100 amino acids or more were used to impair  
123 the shuttling properties of UPF1, which bears the risk of inducing conformational changes in the  
124 protein that indirectly affect nucleo-cytoplasmic transport. A more detailed mapping of the NLS and  
125 NES would be very useful for studying the reported functions of UPF1 in the nucleus and in the  
126 cytoplasm and clearly distinguish them from each other.

127 First, we addressed whether the two UPF1 isoforms found in human cells might differ in their  
128 subcellular localization. UPF1 isoform 2, which results from alternative pre-mRNA splicing and lacks 11  
129 amino acids in a regulatory loop of the helicase domain, is more abundant in human cells and better  
130 characterized than isoform 1 (Gowravaram *et al.*, 2018; Nicholson et al., 2014). The extended  
131 regulatory loop of UPF1 isoform 1 was found to increase UPF1's translocation and ATPase activities by  
132 two-fold (Gowravaram *et al.*, 2018), but apart from this no functional differences between the two  
133 isoforms are known. To investigate the localization of both UPF1 isoforms, enhanced green  
134 fluorescence protein (GFP) was fused via a linker of 17 glycine residues (G-linker) to the C-terminus of  
135 UPF1 isoform 1 (iso1) or isoform 2 (iso2). Similar expression of both GFP-tagged UPF1 isoforms in HeLa  
136 cells upon transient transfection of the expression plasmids was confirmed by Western blotting (Figure  
137 S1A). Examination of the cells under the fluorescence microscope revealed that both UPF1 isoforms  
138 were cytoplasmic at steady state and without any treatment (EtOH control; Figure 1C). For both  
139 isoforms, a weak nuclear accumulation of UPF1-GFP could be detected 2 hours after addition of  
140 leptomycin B (LMB) and a clear nuclear signal after 6 hours (Figure 1C). LMB specifically inhibits the  
141 nuclear export receptor CRM1 and therefore causes nuclear accumulation of shuttling proteins  
142 exported via the CRM1 pathway (Kudo et al., 1998). Since we detected no difference in localization

143 between the two UPF1 isoforms, the predominant and better studied isoform 2 was used for all  
 144 subsequent experiments.

Figure 1

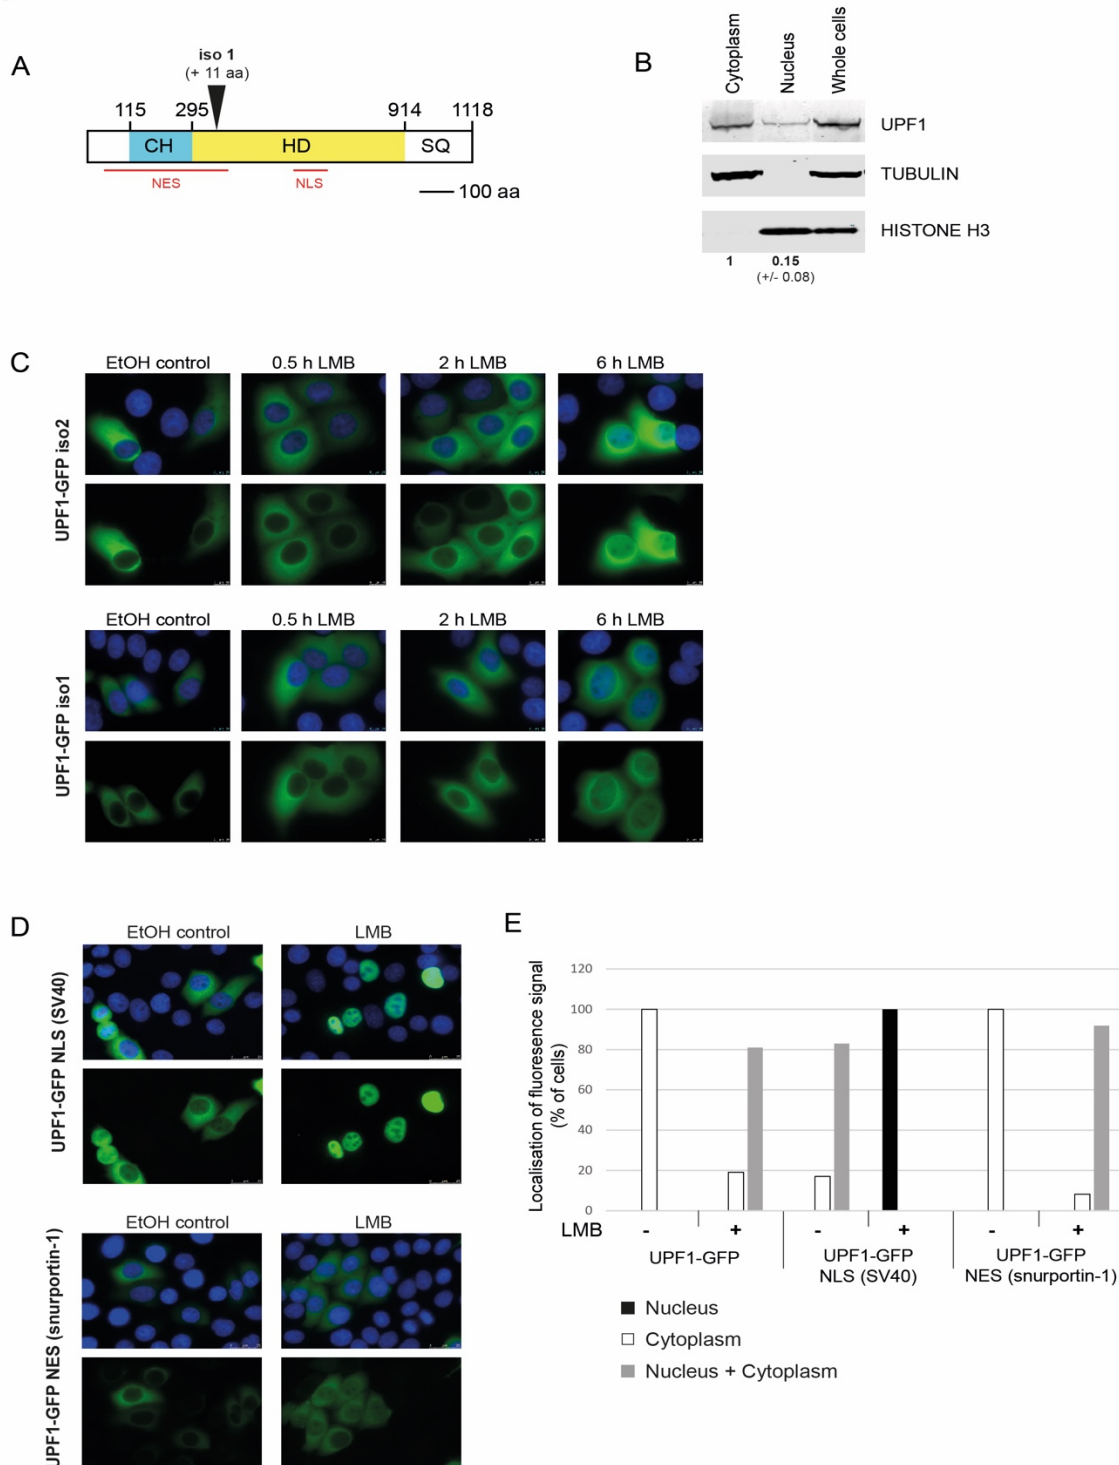

145

146 **Figure 1. UPF1 is a shuttling protein.** **A.** Schematic structure of UPF1 including NLS and NES postulated by  
 147 Mendell [adapted from (Kim and Maquat, 2019; Mendell *et al.*, 2002)]. **B.** Localization of UPF1 in HeLa cells was  
 148 assessed by Western Blotting of nuclear and cytoplasmic fractions. Detection of TUBULIN and HISTONE H3 was

149 used to control the quality of the biochemical fractionations. Quantification by Image Studio software of the  
150 UPF1 signal in three independent experiments showed a ratio of nucleus to cytoplasm of 0.15 (+/- 0.08).  $2 \times 10^5$   
151 cell equivalents were loaded in each lane. **C.** Plasmids encoding UPF1-GFP isoform 2 (iso2) or isoform 1 (iso1)  
152 were transfected into HeLa cells and 48 hours later analyzed by fluorescence microscopy when no LMB was  
153 added (EtOH control) or when LMB was added for 0.5, 2 or 6 hours. Pictures of the GFP signal in the green channel  
154 and a composite of the green and blue channel (DAPI staining for nucleus) are shown. **D.** NLS of SV40 (PKKKRKV)  
155 or NES of snurportin-1 (EELSQUALASSFSV) was attached at the C-terminus of UPF-GFP. Transfected HeLa cells  
156 treated without LMB or with LMB (6 hours) were examined by fluorescence microscopy as in C. **E.** GFP signals of  
157 individual cells (from experiments in B and C) were observed and classified into complete nuclear localization  
158 (black bars), complete cytoplasmic localization (white bars) or localization in nucleus and cytoplasm (grey bars).  
159 Cells of two independent experiments were analyzed: UPF1-GFP n=68/105 (-LMB/+LMB); UPF1-GFP NLS (SV40)  
160 n=47/55 (-LMB/+LMB); UPF1-GFP NES (snurportin-1) n=78/61 (-LMB/+LMB).

161

162 To get insights into the shuttling properties of UPF1, a strong NLS from SV40 or a strong NES from  
163 snurportin-1 was attached to the C-terminus of UPF1-GFP (Kazgan et al., 2010) (Figures 1D and S1B).  
164 The addition of the strong SV40 NLS led to a more pronounced nuclear localization compared to UPF1-  
165 GFP, even in the absence of LMB, indicating that UPF1 intrinsic NLS is considerably weaker than the  
166 SV40 NLS (Figure 1C-E). However, since cytoplasmic GFP signal could be detected in all cells expressing  
167 UPF1-GFP NLS (SV40), there is evidence for a potent endogenous NES in UPF1. In the presence of LMB,  
168 the GFP signal was completely nuclear for UPF1-GFP NLS (SV40) in all cells observed (Figure 1D and E).  
169 Attaching the strong NES from snurportin-1 to the C-terminus of UPF1-GFP resulted in cytoplasmic  
170 localization in the absence of LMB and to cytoplasmic and nuclear GFP signal upon addition of LMB in  
171 about 90 % of the cells, proving that the UPF1-GFP NES (snurportin-1) protein was indeed shuttling  
172 and accumulated in the nucleus when export was impaired (Figure 1D and 1E). In contrast to the  
173 addition of a NLS, insertion of the snurportin-1 NES did not affect the localization behaviour of UPF1-  
174 GFP, further indicating that UPF1 possesses a potent endogenous NES with a comparable activity to  
175 the snurportin-1 NES (Figure 1C-E).

176

### 177 **No classical NLS is present in UPF1**

178 Next, we attempted to define the NLS of UPF1 and inactivate it by point mutations to obtain an  
179 exclusively cytoplasmic version of UPF1. The bioinformatic tool *cNLS mapper* has been developed to  
180 predict importin  $\alpha$ -dependent NLS (Kosugi et al., 2009b). Interestingly, the only predicted monopartite  
181 classical NLS (cNLS) in the UPF1 protein (score above 5.0) resided at amino acid positions 596-606  
182 (RALKRTAEREL), right at the start of the putative 102 amino acids long NLS mapped previously (Mendell



183 *et al.*, 2002). Furthermore, no bipartite cNLS was predicted by *cNLS mapper*. The sequence encoding  
184 the putative NLS was deleted by fusion PCR from the UPF1-GFP construct, giving rise to the construct  
185 UPF1-GFP  $\Delta$ 596-606. In addition, a control plasmid in which the large NLS region proposed by Mendell  
186 was deleted was cloned (UPF1-G16-GFP  $\Delta$ 596-697). The plasmids were transfected into HeLa cells, the  
187 expression of the proteins was confirmed by Western blotting (Figure S1C) and the GFP signal was  
188 analyzed by fluorescence microscopy (Figure 2A). Confirming the initial study (Mendell *et al.*, 2002),  
189 UPF1-GFP lacking amino acid residues 596-697 was entirely cytoplasmic even upon addition of LMB,  
190 indicating that the NLS is located in this region of the helicase domain (Figure 2A). In contrast, the  
191 deletion of the predicted NLS (amino acids 596-606) localized indistinguishable to wild-type (wt) UPF1-  
192 GFP with mainly cytoplasmic signal in the absence of LMB and a clear nuclear accumulation upon LMB  
193 addition, indicating that deletion of these 11 amino acids was not sufficient to impair protein import  
194 (Figure 2A).

195 For the classical protein import pathway, basic amino acids are typically crucial to allow for binding of  
196 importin  $\alpha$ , which acts as an adapter protein between the NLS-containing cargo protein and importin  
197  $\beta$ , which is responsible for the transport through the nuclear pore (Kosugi *et al.*, 2009a). To test if UPF1  
198 is transported to the nucleus by the importin  $\alpha/\beta$  pathway, all 10 positively charged amino acids in the  
199 region 607-697 were replaced by alanines (all together (A6) or in different combinations (A1-A5);  
200 Figures 2B and S1C). If two to five lysines/arginines were replaced (constructs A1-A5), UPF1-GFP  
201 behaved like wt with cytoplasmic localization in control conditions and nuclear and cytoplasmic signal  
202 after treatment with LMB (Figure 2B). When all 10 positively charged amino acids were changed (A6),  
203 the GFP signal was also cytoplasmic in the absence of LMB as for the other constructs, however and  
204 unexpectedly, an almost exclusively nuclear signal was detected in the presence of LMB. To further  
205 analyze this curious finding, we identified by mass spectrometry proteins that co-precipitated with the  
206 A6 UPF1-GFP mutant and found many heat shock proteins, suggesting that this mutant fails to fold  
207 properly (Figure S1D). Collectively from this series of experiments attempting to decipher the NLS of  
208 UPF1, we conclude that UPF1 most likely does not contain a classical NLS and that it is imported into  
209 the nucleus in an importin  $\alpha$ -independent manner.

210

### 211 **Helicase activity of UPF1 but not its binding to RNA is important for shuttling capacity**

212 Interestingly, the highly conserved and well characterized amino acids aspartate and glutamate at  
213 amino acid positions 636 and 637 lie within the helicase region that is important for UPF1 import to  
214 the nucleus (Bhattacharya *et al.*, 2000). When these two residues are mutated (DE variant), RNA and  
215 ATP can still bind to UPF1, but ATP hydrolysis and thus helicase activity is impaired, leading to P-body



Figure 2

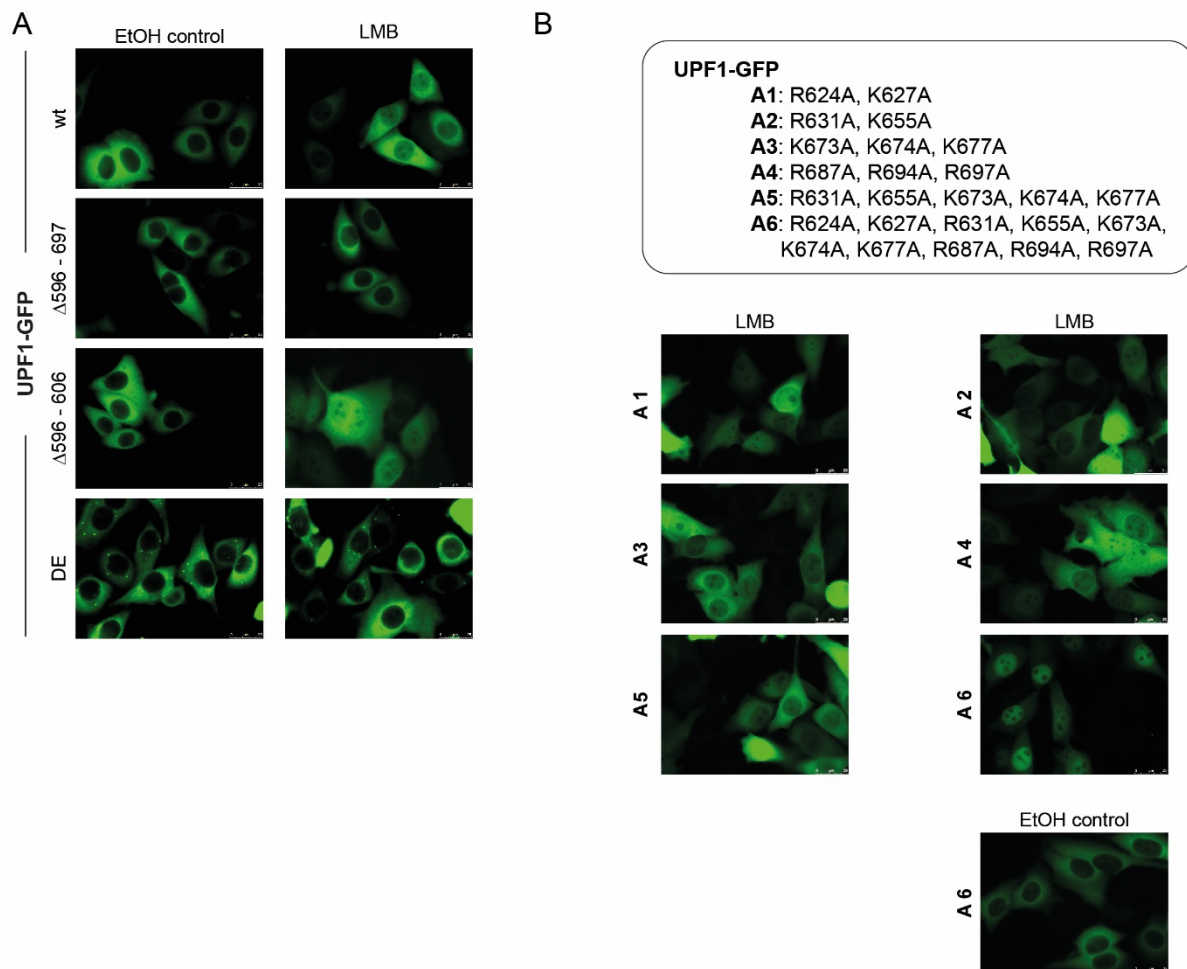

216

217 **Figure 2. Investigation of UPF1's NLS.** A. Plasmids encoding UPF1-GFP wild type or different variants of UPF1  
218 [deletions: UPF1-GFP Δ596-697 and UPF1-GFP Δ596-606; point mutations: D636A + E637A (DE)] were  
219 transfected into HeLa cells and the fluorescence signals were analyzed 48 hours after transfection in the control  
220 condition (EtOH control) and upon addition of LMB for 6 hours (LMB). B. Positively charged amino acids were  
221 replaced by alanines as explicated in the legend above the fluorescence pictures. Experiment was performed as  
222 in A. The EtOH control is shown only for UPF1-GFP A6.

223

224 formation when this mutant is overexpressed in cells (Cheng *et al.*, 2007; Franks *et al.*, 2010) (Figure  
225 2A). The UPF1-GFP DE mutant showed cytoplasmic localization even in the presence of LMB,  
226 suggesting that the helicase activity is necessary for moving to the nucleus (Figure 2A). Several studies  
227 indicated that this mutant is stuck on RNA, since dissociation from RNA requires ATP hydrolysis (Franks  
228 *et al.*, 2010; Lee *et al.*, 2015). This failure to dissociate from RNA leads to the formation of large RNA-  
229 protein aggregates (i.e. P-bodies), which we reasoned might sequester UPF1 in the cytoplasm and  
230 prevent its transport into the nucleus.

231 Therefore, we decided to test whether RNA binding is important for UPF1's ability to shuttle between  
232 the nucleus and the cytoplasm. Based on the UPF1 crystal structure (Chakrabarti *et al.*, 2011), it was  
233 predicted that the three amino acids asparagine 524, lysine 547 and arginine 843 might be engaged in  
234 and required for RNA binding (Sutapa Chakrabarti, personal communication). We therefore mutated  
235 these three amino acids to alanines (UPF1 RM, for RNA mutant) and tested the capacity of this mutant  
236 to bind RNA using MicroScale Thermophoresis (MST). To this end, we affinity-purified triple-FLAG-  
237 tagged UPF1 proteins (UPF1-3F and UPF1 RM-3F) from HEK cells (Figure 3A). The purified recombinant  
238 proteins were titrated (from 200 nM to 0.0061 nM) against a constant amount (20 nM) of Cy5-labelled  
239 U30 RNA. Binding of wt UPF1 to RNA displayed a sigmoidal dose-response curve from which a  $K_d$  of  
240  $25.33 \pm 4.43$  nM was calculated, whereas UPF1 RM failed to bind the U30 RNA (Figure 3B).

Figure 3

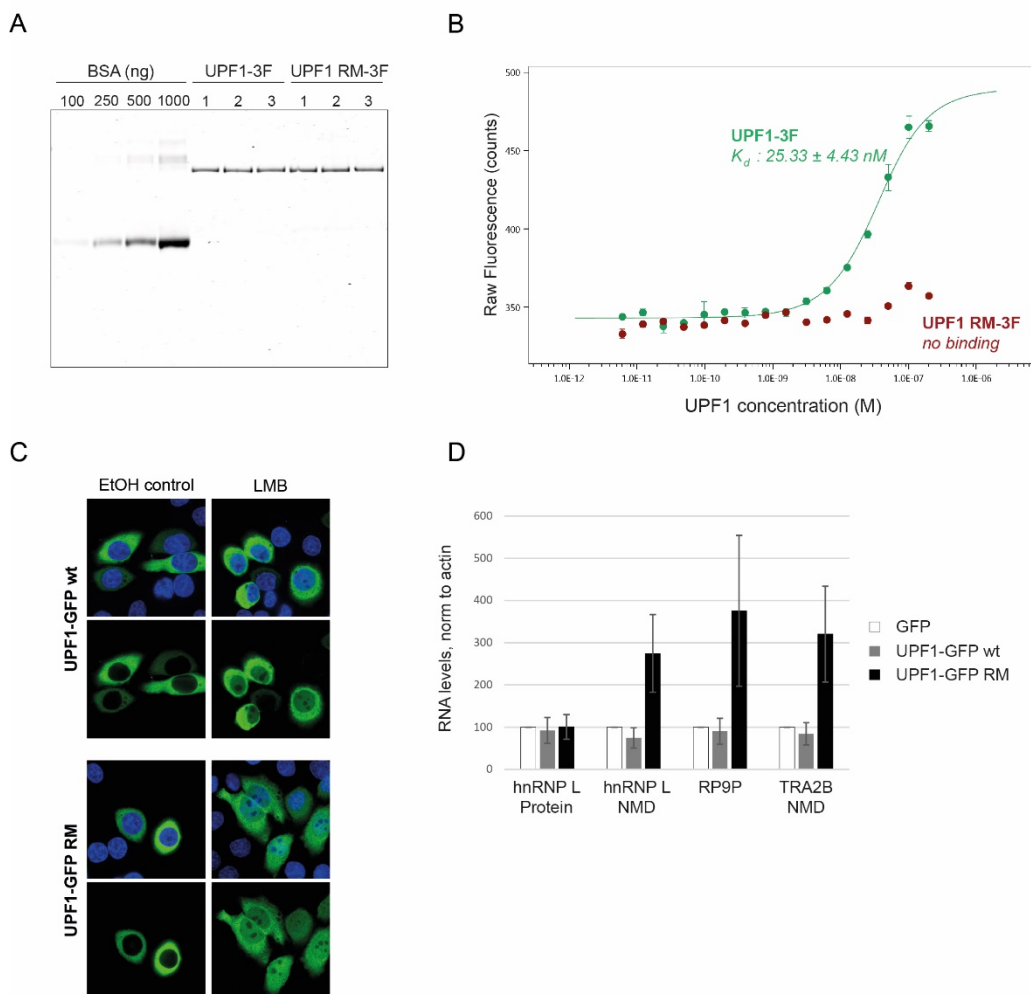

241

242 **Figure 3. RNA binding is not necessary for shuttling.** **A.** UPF1-3F and UPF1 RM-3F (RNA mutant: N524A, K547A  
243 and R843A) proteins were overexpressed in HEK cells and affinity purified by the triple Flag tag. The quality of  
244 the purification was assessed by SDS-PAGE. 25% of the immunoprecipitated material was loaded in a 4-12%  
245 gradient gel and proteins were stained with Imperial Protein Stain. Three independent purifications (1,2,3) are  
246 shown. BSA was used to estimate the concentration of the purified proteins. **B.** UPF1-3F (in green) and UPF1 RM-

247 3F (in red) binding to Cy5-labeled U30 RNA (20 nM) was analyzed by MicroScale Thermophoresis. The raw  
248 fluorescence counts are plotted against the final concentration of the unlabelled titrated proteins (200–0.0061  
249 nM). The estimated  $K_d$  for UPF1-3F is  $25.33 \pm 4.43$  nM. Averages and standard deviations from two independent  
250 measurements are shown. **C.** UPF1-GFP or UPF1-GFP RM were expressed in HeLa cells and GFP signal was  
251 monitored by confocal fluorescence microscopy. GFP signal (green channel) and GFP together with DAPI signal  
252 (blue channel) are shown in control condition and upon addition of LMB (6 hours). **D.** RNA levels of HeLa cells  
253 expressing of GFP, UPF1-GFP wt or UPF1-GFP RM were analyzed by RT-qPCR. Relative mRNA levels of hnRNP L  
254 Protein, hnRNP L NMD, RP9P, and TRA2B NMD, normalized to actin mRNA levels, are depicted. Averages and  
255 standard deviations arise from three independent experiments.

256

257 The localization of this mutant was eventually investigated by fluorescence microscopy analysis and  
258 compared to wt UPF1-GFP. Confocal fluorescence microscopy revealed that UPF1-GFP RM was still  
259 able to move between cytoplasm and nucleus as judged from the nuclear accumulation upon LMB  
260 treatment, indicating that the capacity of UPF1 to shuttle does not depend on its binding to RNA (Figure  
261 3C). Interestingly, this RNA binding mutant of UPF1 had a dominant negative effect on NMD (Figure  
262 3D and below).

263

#### 264 **Amino acids L103 and F105 are required for nuclear export of UPF1**

265 To characterize the amino acid residues crucial for nuclear export, the N-terminal region of UPF1 that  
266 was previously identified as being required for export (amino acids 55-416) (Mendell *et al.*, 2002) was  
267 analyzed by the bioinformatic tool 'LocNES' (Xu *et al.*, 2015). This algorithm predicted amino acids 89-  
268 105 (VDDSVAKTSQLLAELNF), just upstream of the CH domain, to function as a NES. We deleted the  
269 nucleotides encoding this 17 amino acids stretch by fusion PCR, generating the plasmid UPF1-GFP  $\Delta$ 89-  
270 105. Analysis by confocal microscopy of this UPF1 deletion showed a clear nuclear signal both in the  
271 control and LMB condition (Figure 4A). Classical NES (also called leucine-rich NES) are typically 8-15  
272 residues long and characterized by conserved hydrophobic amino acids – often leucine – that are  
273 separated by one, two and three other amino acids (e.g. L-X<sub>3</sub>-L-X<sub>2</sub>-L-X-L, where L is a hydrophobic  
274 amino acid and X any amino acid) (Kosugi *et al.*, 2008). To inactivate the putative NES, two or four  
275 hydrophobic amino acids in the predicted NES of UPF1 were changed to alanine giving raise to the  
276 mutant constructs UPF1 LF and UPF1 VLLF, and expression of the proteins in HeLa cells was confirmed  
277 by Western blotting (Figure S2A). Analysis of these UPF1-GFP mutants by fluorescence microscopy  
278 showed that these amino acid residues are indeed important for the export of UPF1 from the nucleus.  
279 Mutations of two (L103A and F105A) or four (V93A, L100A, L103A, and F105A) amino acids led to clear

280 nuclear signals already without LMB, and the signals stayed the same when LMB was added for six  
281 hours (Figure 4A).

282 To unambiguously confirm (i) that this region of UPF1 is indeed the NES, (ii) that amino acids L103 and  
283 F105 are necessary for NES activity, and (iii) that the observed localization is not an effect of misfolded  
284 UPF1, a simple but elegant system from the Chook laboratory was adopted (Xu *et al.*, 2015). In this  
285 reporter system, the strong NLS of SV40 was fused C-terminally to the enhanced yellow fluorescent  
286 protein (YFP), resulting in an exclusively nuclear signal in the absence and presence of LMB (Figure 4B).  
287 Next, different NESs were added downstream of YFP-NLS to test their ability to re-localize YFP to the  
288 cytoplasm. As control for a strong and weak NES sequence, the NES of PKI $\alpha$  and CDC7 were used, which  
289 results in a strong or a faint cytoplasmic YFP signal, respectively (Xu *et al.*, 2015) (Figures 4B and S2B).  
290 To test the putative NES of UPF1 in this assay, the sequence coding for the 17 amino acid residues  
291 predicted by LocNES plus the subsequent highly conserved glutamate (VDDSVAKTSQLLAELNFE) was  
292 added downstream to YFP-NLS coding sequence and after transient transfection into HeLa cells, the  
293 yellow fluorescence was detected by confocal fluorescence microscopy. In the absence of LMB (EtOH  
294 control), the putative NES of UPF1 (UPF1 wt) led to a clear shift of the YFP signal towards the cytoplasm,  
295 indicating that these amino acids are sufficient to promote nuclear export of the YFP-NLS construct  
296 and hence constitute a functional NES (Figure 4B). Quantitative fluorescence intensity analysis of 50  
297 cells per condition using the Cell Profiler software (Carpenter *et al.*, 2006) revealed that the UPF1 NES  
298 caused a 6-fold increase in the fluorescence intensity ratio between cytoplasm and nucleus compared  
299 to the YFP-NLS control, which indicates that the strength of the UPF1 NES is somewhere in between  
300 the strong PKI $\alpha$  NES (10-fold increase) and the weaker CDC7 NES (3.5-fold increase) (Figure 4C).  
301 Importantly, addition of LMB prevented the export of the YFP protein with each of the three NES,  
302 confirming that they engage the CRM1-dependent export pathway (Figure 4B-C).

303 When the two mutated versions of the UPF1 NES (UPF1 LF: VDDSVAKTSQLLAEANA~~E~~ and UPF1 VLLF:  
304 VDDSAAKTSQLA~~E~~ANA~~E~~) were tested in this assay, no export of YFP to the cytoplasm was observed,  
305 confirming that amino acids L103 and F105 are necessary for UPF1's NES function (Figures 4B-C and  
306 S2B). Collectively, we have precisely defined the NES in UPF1 and identified two crucial amino acids  
307 (L103 and F105) that when mutated inactivate this NES. Notably, the UPF1 NES sequence is highly  
308 conserved among mammals, *D. melanogaster*, and *A. thaliana* but not so clearly defined in *S. pombe*  
309 (Figure 4D).

Figure 4

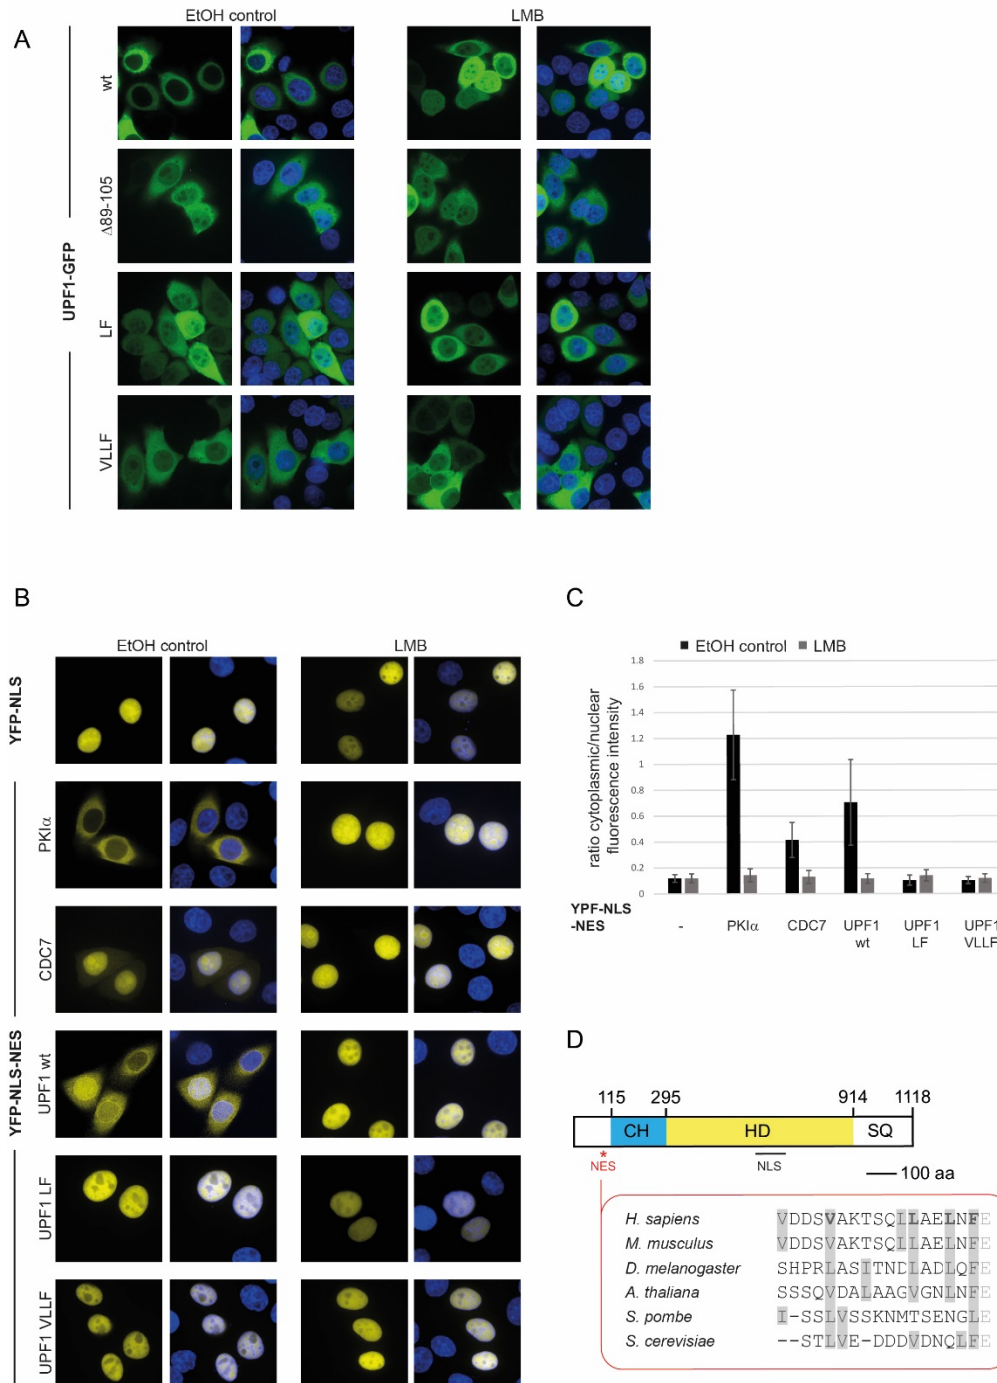

310

311 **Figure 4. Investigation of UPF1's NES.** **A.** UPF1-GFP wild type or variants (deletion of amino acid 89-105; point  
 312 mutations V93A, L100A, L103A, F105A and L103A, F105A) were expressed in HeLa cells and analyzed as in Figure  
 313 3C. **B.** The localization of YFP was determined by confocal fluorescence microscopy and DAPI was used for  
 314 staining the nucleus. YFP followed by the NLS of SV40 served as a control (upper panel). Insertion of a NES (of  
 315 PKI $\alpha$ , CDC7 or UPF1 wt) to YFP-NLS led to a shift of the yellow signal to the cytoplasm, but insertion of a mutated  
 316 NES (UPF1 LF and UPF1 VLLF) to YFP-NLS or LMB treatment prevented the export of YFP. **C.** The average ratio of  
 317 mean cytoplasmic to mean nuclear fluorescence intensity are shown with standard deviations. In total 50 cells  
 318 per condition (from three independent experiments) were analyzed by Cell Profiler software



319 ([www.cellprofiler.org](http://www.cellprofiler.org)). DAPI and phalloidin staining were used for defining nucleus and cytoplasm (see also  
320 Figure S2B). **D.** Schematic illustration of UPF1 as in Figure 1A with amino acid sequence of the NES in human,  
321 mouse, fly, plant, and yeasts. Hydrophobic amino acids (phenylalanine, leucine, isoleucine, valine) are marked in  
322 grey.

323

#### 324 **The LF mutant is functional in NMD and interacts with known NMD factors**

325 In the next series of experiments, we aimed to characterize if a functional NES is critical for the activity  
326 of UPF1. To this end, we used the above-mentioned NES mutants and analyzed whether the interaction  
327 of UPF1 to other proteins is disturbed by inactivation of the NES. Immunoprecipitation experiments  
328 using GFP nanobodies in HeLa cells expressing either GFP alone, UPF1-GFP wt, UPF1-GFP LF or UPF1-  
329 GFP VLLF revealed no difference in the interaction pattern between the wt and the mutated UPF1  
330 proteins (Figure S2C). When we examined the immunoprecipitated material by Western blotting,  
331 interactions with the two NMD factors UPF2 and SMG6 were confirmed for wt UPF1 and for the NES  
332 mutants LF and VLLF (Figure 5A). Specificity of the immunoprecipitation was controlled in HeLa cells  
333 expressing GFP alone and the absent interaction to GAPDH for all pulldowns (Figure 5A).

334 Finding that the NES-impaired mutant still interacts with important NMD factors and that the  
335 mutations are not part of the CH or helicase domain led us to hypothesize that the LF mutant might  
336 still function in NMD. To test this, we used a plasmid with a bidirectional promoter that allows  
337 simultaneous knockdown (kd) of the endogenous UPF1 protein and expression of an RNAi resistant  
338 UPF1 protein, either wt or mutant versions thereof. We expressed the plasmids transiently in HeLa  
339 cells (Figure 5B and S3A) or stably integrated them into HEK293-T Rex Flp-in cells (Figure 5C-E and S3B-  
340 D). All UPF1 constructs were tagged at the C-terminus with a triple FLAG peptide for affinity purification  
341 (Figure 3A), immunofluorescence (Figure S3A-B) and Western blot analysis (Figure 5D).  
342 Immunofluorescence experiments clearly revealed that, while a fraction of the UPF1 LF mutant  
343 localized to the nucleus, most of it is still found in the cytoplasm where the protein might be needed  
344 for the translation-dependent NMD pathway (Figure S3A-B).

345 In the HEK293 cells, the bidirectional promoter was induced by doxycycline (Dox) and cells were  
346 analyzed at different time points to find the best knockdown and rescue conditions. 96 hours after Dox  
347 addition, endogenous UPF1 protein was robustly reduced, the stabilization of NMD transcripts in the  
348 knockdown condition was the highest for two out of three tested transcripts, and NMD activity could  
349 be efficiently rescued by the expression of a FLAG tagged UPF1 wt version (UPF1<sup>R</sup>-3F) (Figure S3C-D).  
350 Analysis of the different HEK cell lines by RT-qPCR 96 hours after Dox induction showed increased RNA  
351 levels for endogenous NMD-sensitive transcripts (hnRNP L NMD, RP9P, and TRA2B NMD) when the  
352 endogenous UPF1 was depleted and an unrelated control protein (maltose-binding protein, MBP-3F)

Figure 5

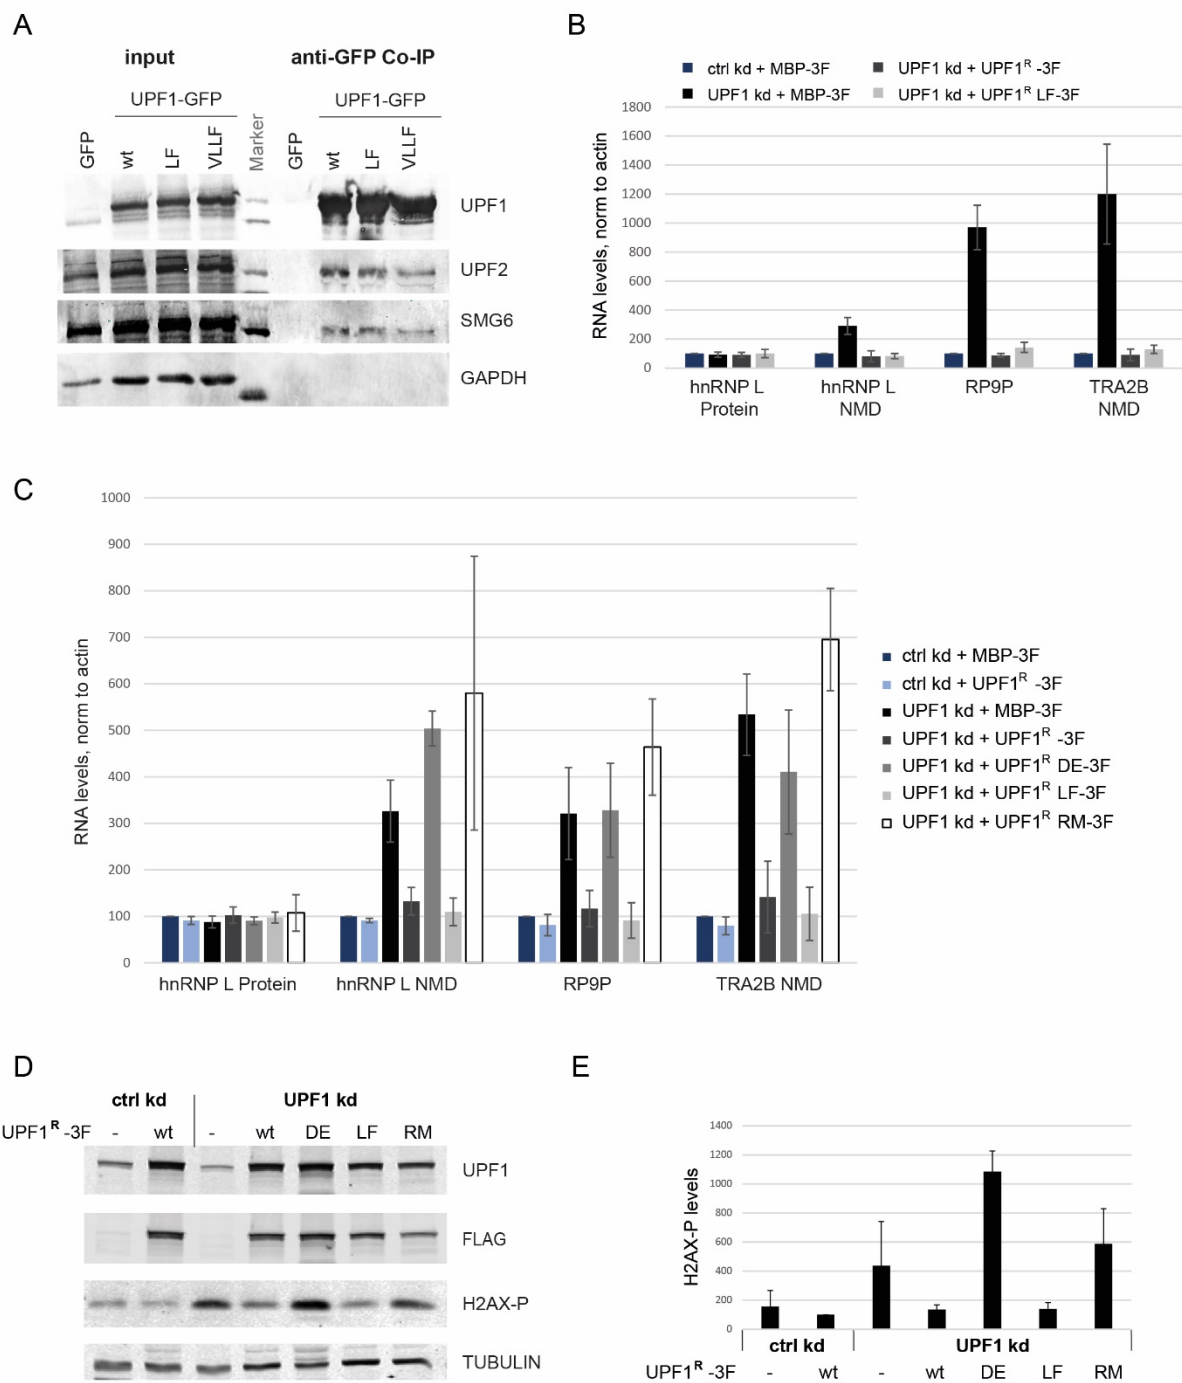

353

354 **Figure 5. UPF1 LF mutant is functional in NMD.** **A.** Western Blotting to analyze co-immunoprecipitation  
 355 experiments performed with the help of GFP nanobodies in HeLa cells expressing GFP alone, UPF1-GFP wt, UPF1-  
 356 GFP LF mutant or UPF-GFP VLLF mutant. 2 % of starting material (input) and 60% of the immunoprecipitated  
 357 material was loaded on an SDS-PAGE. The membrane was probed against UPF1, UPF2, SMG6, and GAPDH as a  
 358 control. **B.** HeLa cells were transfected with pKK plasmids to simultaneously knockdown UPF1 (UPF1 kd) and over  
 359 express RNAi resistant UPF1 wt or LF mutant. Knockdown against luciferase (ctrl kd) and expression of maltose  
 360 binding protein (MBP) served as control. The cells were selected with puromycin for 48 hours and harvested 96  
 361 hours after transfection. Relative mRNA levels of hnRNP L Protein, hnRNP L NMD, RP9P, and TRA2B NMD,



362 normalized to actin mRNA levels, were determined by RT-qPCR. Averages and standard deviations from three  
363 independent experiments are shown. **C.** HEK cells were induced for 96 h with Dox to express simultaneously  
364 siRNAs against UPF1 (UPF1 kd) or against luciferase (ctrl kd) and RNAi resistant UPF1 versions (wt, DE, LF or RM  
365 variants). As control, MBP was expressed instead of UPF1<sup>R</sup>. Relative mRNA levels, normalized to actin mRNA  
366 levels, were measured by RT-qPCR in three independent experiments as in B. **D.** H2AX phosphorylation was  
367 assessed by immunoblotting of HEK cells harvested 96 hours after addition of Dox (as in C). UPF1 expression  
368 (endogenous and Flag-tagged) was controlled by probing the membrane with anti-UPF1 and anti-FLAG antibody.  
369 TUBULIN served as loading control. **E.** Phosphorylated H2AX levels on Western Blots were quantified by using  
370 Image Studio software and normalized to TUBULIN. Averages and standard deviations of three independent  
371 experiments are depicted.

372

373 expressed (Figure 5C). The observed stabilization of transcripts is specific for NMD targets, since  
374 transcripts that are not targeted by NMD like the hnRNP L protein coding splice isoform (hnRNP L  
375 Protein) or actin did not react to the UPF1 kd. As expected, expression of RNAi-resistant wt UPF1 was  
376 able to rescue the NMD phenotype and the stabilization was reversed to control levels (UPF1 kd +  
377 UPF1R-3F; Figures 5C and S3D). The helicase-deficient DE mutant served as a control, since the helicase  
378 activity of UPF1 is required for NMD and therefore, as expected, NMD activity was not restored when  
379 overexpressing this mutant (UPF1 kd + UPF1<sup>R</sup> DE-3F; Figure 5C). Interestingly, the NES-inactivating LF  
380 mutant was fully functional in NMD and restored NMD activity in cells with a kd of endogenous UPF1  
381 (UPF1 kd + UPF1<sup>R</sup> LF-3F; Figure 5C). The functionality of the LF mutant in NMD was corroborated when  
382 transiently expressed in HeLa cells (Figure 5B). The new RNA binding mutant characterized in Figure 3  
383 was also not able to rescue the UPF1 kd phenotype and RNA levels of the NMD sensitive transcripts  
384 are similar to the ones in the DE mutant (UPF1 kd + UPF1<sup>R</sup> RM-3F; Figure 5C). It should be noted that  
385 overexpression of this mutant was detrimental for cells and, without knocking down the endogenous  
386 UPF1, the RNA binding mutant acts as dominant negative mutant (Figure 3D). Notably, one of the three  
387 amino acids that were changed was already shown in 1998 to have dominant-negative effects on NMD  
388 (Sun et al., 1998).

389 Lastly, the function of the LF mutant in the phosphorylation of H2AX was investigated. Nuclear  
390 functions of UPF1 are poorly understood and it is not clearly proven whether H2AX phosphorylation is  
391 a direct effect of UPF1 in the nucleus or an indirect effect of for instance impaired NMD occurring in  
392 the cytoplasm. As reported before, depletion of UPF1 resulted in an increase of H2AX phosphorylation  
393 and this increase can be rescued with the wt version of UPF1 (Azzalin and Lingner, 2006) (Figure 5D-  
394 E). The NES mutated LF version acts very similar to UPF1 wt leading to a reduced H2AX  
395 phosphorylation, similar to control levels, and is thus functional in this process. The DE and the RNA

396 binding mutant were not able to reverse the H2AX increase and are therefore not only impaired in the  
397 NMD pathway, but also in this nuclear outcome (Figure 5C-D).

398

## 399 Discussion

400 Although there is ample evidence for UPF1 to be a shuttling protein with only a small fraction of the  
401 protein residing inside the nucleus at steady state, the NLS and NES of UPF1 have so far not been  
402 precisely mapped. In this study, we first showed that the intracellular distribution is indistinguishable  
403 between the two UPF1 isoforms 1 and 2, which differ by an 11 amino acid loop in the helicase domain,  
404 and then confirmed a previously reported 100 amino acids stretch in the helicase domain to be  
405 necessary for nuclear import of UPF1 (Mendell *et al.*, 2002). Further delineation of this NLS, however,  
406 was not possible since a smaller deletion of that region ( $\Delta$ 596-606) or mutations therein (A1-A5) did  
407 not lead to any changes in localization of the protein compared to the wild type situation. By contrast,  
408 the LocNES algorithm (Xu *et al.*, 2015) successfully predicted the NES to reside between amino acids  
409 89 and 105, in the N-terminal part of UPF1 right upstream of the CH domain (Figure 3D). Changing the  
410 conserved amino acids L103 and F105 to alanine abolished the activity of this NES and led to UPF1  
411 accumulation in the nucleus.

412 We noticed that based on the biochemical fractionation between cytoplasm and nucleus, a larger  
413 fraction of the total cellular UPF1 appeared to be present in the nucleus at steady state than when  
414 compared to the amount of nuclear UPF1 detected on the fluorescence microscopy images (Figure 1B  
415 and C). We attribute this to the fact that nuclear fractions, in addition to intranuclear material, tend to  
416 also contain proteins associated with the outer nuclear membrane and it was recently shown that a  
417 fraction of the cellular UPF1 associates with the endoplasmic reticulum (ER) (Longman *et al.*, 2020),  
418 which is seamlessly connected to the outer nuclear membrane. Consistent with this view, the  
419 microscopic images often show a ring-like structure around the nucleus, indicating a high  
420 concentration of UPF1 around it (Figures 1 and 2). Notably, the two UPF1 isoforms 1 and 2, which differ  
421 by 11 amino acids in a regulatory loop of the helicase domain, showed the same subcellular localization  
422 (Figure 1C), arguing against isoform-specific nuclear and cytoplasmic functions of UPF1. Since the NLS  
423 and the NES that we defined in this study do not overlap with the alternatively spliced part that gives  
424 raise to the two UPF1 isoforms, this observation was expected.

425 The experiments with the export inhibitor LMB showed that UPF1 is imported to the nucleus at a rather  
426 slow rate and even 6 hours after LMB addition not all UPF1 localized to the nucleus, indicating that the  
427 ill-defined NLS of UPF1 must be considerably weaker than a classical NLS. Perhaps, the NLS of UPF1 is  
428 not always accessible for the import receptor and a sub-population of UPF1 might not be imported to  
429 the nucleus because its NLS might be masked by other interacting proteins or by an alternative

430 conformation of UPF1 itself. Despite all efforts, we were not able to pinpoint the NLS of UPF1 to specific  
431 amino acids or to a shorter amino acid stretch than previously reported (Mendell *et al.*, 2002). In  
432 addition to the common importin  $\alpha$ -dependent import, there are cases reported where importin  $\beta$   
433 directly binds to non-canonical NLSs that are more diverse and less defined (Lee *et al.*, 2006). Many of  
434 these non-canonical NLSs directly bound by importin  $\beta$ 1 are also rich in arginine and therefore  
435 mutating positively charged amino acids in the helicase region 607-697, as done in Figure 2B, would  
436 most likely also disturb nuclear import mediated by importin  $\beta$ 1. Non-canonical NLSs that are  
437 recognized by importin  $\beta$ 2 have often an overall basic character plus a relatively conserved proline-  
438 tyrosine (PY) dipeptide (Lee *et al.*, 2006). However, no such a PY-NLS could be identified in UPF1,  
439 leading to the speculation that UPF1 might hitchhike to the nucleus by binding to another protein.

440 Interestingly, helicase deficient D636A/E637A UPF1 stayed cytoplasmic even when cells were treated  
441 with LMB, corroborating the results obtained with *Drosophila* cells (Singh *et al.*, 2019). Since UPF1  
442 helicase activity is required for its dissociation from RNA, we hypothesized that the impaired helicase  
443 activity leads to formation of cytoplasmic protein-RNA aggregates that would trap UPF1 in the  
444 cytoplasm (Franks *et al.*, 2010). In fact, we showed here that UPF1's subcellular localization is not  
445 influenced by its RNA binding capacity, as the triple mutant N524A/K547A/R843A, which no longer  
446 binds RNA, did not alter the shuttling behaviour. The RNA binding mutant still accumulated in the  
447 nucleus upon LMB treatment, indicating that the import of UPF1 does not require its capacity to bind  
448 RNA. Furthermore, its cytoplasmic localization at steady state, indistinguishable from wild type UPF1,  
449 indicates that association with RNA is not required for the export of UPF1. Supporting this conclusion  
450 is also the observation that UPF1 export is inhibited by LMB, implying that the export of UPF1 is  
451 mediated by CRM1 rather than by the main mRNA export factor NXF1 (Okamura *et al.*, 2015).  
452 Collectively, the results of these mutants showed that the helicase activity and the RNA binding  
453 capacities are indispensable for NMD but do not affect the subcellular distribution of UPF1.

454 In this study we mapped the NES of UPF1 to amino acids 89-105 and showed that L103 and F105 are  
455 crucial for its activity, since replacement of these two amino acids with alanine led to a clear  
456 redistribution of UPF1 signal towards the nucleus. Notably, this region is highly conserved among  
457 metazoans but slightly less in the yeasts *S. pombe* and *S. cerevisiae* (Figure 4D), suggesting that the  
458 shuttling behaviour of UPF1 might be restricted to metazoans or that in yeast, another NES in another  
459 part of the protein has evolved.

460 Having identified the NES of UPF1 allowed us to increase UPF1 abundance inside the nucleus, which  
461 we assumed might affect both nuclear and cytoplasmic functions of UPF1. We found that the NES-  
462 deficient UPF1 could rescue NMD to the same extent as wild type UPF1 in cells depleted for  
463 endogenous UPF1, which is not surprising given that still a large amount of the NES mutated protein

464 localized to the cytoplasm. With regards to a reported nuclear function of UPF1, we followed the  
465 approach taken by Azzalin and Lingner (Azzalin and Lingner, 2006) who showed that knocking down  
466 UPF1 led to increased H2AX phosphorylation, suggesting a direct or indirect role for UPF1 in DNA  
467 damage response. When expressing the different UPF1 mutants in cells depleted of endogenous UPF1,  
468 the NES-defective mutant was as good as wild type UPF1 in rescuing H2AX phosphorylation, whereas  
469 the helicase and the RNA binding mutants were unable to rescue. Curiously, the result of the H2AX  
470 phosphorylation experiment mirrored the ability of the tested UPF1 mutants to rescue NMD (Figure  
471 5), which could indicate either that the DNA damage response and NMD are somehow mechanistically  
472 linked, or that they are independent of each other but coincidentally depend both on the same  
473 properties of UPF1 (helicase activity and RNA binding). Further investigations are needed to clarify  
474 whether UPF1's reported roles in nuclear processes are direct or indirect.

475

## 476 **Material and Methods**

477 **Plasmids.** Oligonucleotides used are listed in Table S1. To generate UPF1-GFP iso2 a *XbaI* restriction  
478 site was introduced in pcDNA3-NG-UPF1-WT-FLAG (Rufener and Muhlemann, 2013) downstream of  
479 FLAG tag by site-directed mutagenesis. GFP was amplified by PCR from pcDNA3-MS2-EGFP (McNally  
480 et al., 2006) using oligonucleotides introducing *NotI* and *XbaI* sites. The GFP amplicon was then ligated  
481 into *NotI* and *XbaI* cut plasmid pcDNA3-NG-UPF1-WT-FLAG. Annealed oligonucleotides encoding a  
482 linker of 16 glycine residues (see sequence in Table S1) were inserted into the vector at the *NotI* site  
483 to receive the plasmid encoding the fusion protein UPF1-GFP with a flexible linker in-between. For  
484 obtaining UPF1-GFP iso1, a fragment of UPF1 (from *HindIII* to *KpnI*) was replaced in UPF1-GFP iso2 with  
485 the corresponding iso1 UPF1 fragment. UPF1-GFP NLS (SV40) and UPF1-GFP NES (snurportin-1) were  
486 generated by digesting UPF1-GFP iso2 plasmid with *BsrGI* and *XbaI* (both sites located at the very end  
487 of GFP) and purifying it by Wizard® SV Gel and PCR Clean-Up System (Promega). Annealed  
488 oligonucleotides encoding the NLS of SV40 or NES of snurportin-1 with a stop codon and *BsrGI* and  
489 *XbaI* overhangs at the end are ligated into the linearised UPF1-GFP iso2 vector (oligonucleotides listed  
490 in Table S1). Fusion PCR was performed to generate UPF1-GFP Δ89-105, Δ596-697, and Δ596-606  
491 variants using the oligonucleotides listed in Table S1. UPF1-GFP DE was cloned by exchanging a part of  
492 UPF1-GFP iso2 (from *KpnI* to *SbfI*) with the same part of pcDNA3-NG-UPF1-WT-FLAG DE636AA  
493 containing the two desired changes. Point mutations for the UPF1-GFP RM were introduced  
494 individually by site-directed mutagenesis PCR on cloning plasmids containing parts of UPF1 and then  
495 mutated UPF1 sequences were cloned into the final plasmid by restriction sites (oligonucleotides for  
496 point mutations are listed in Table S1). Point mutations in UPF1-GFP to generate UPF1-GFP A1-A6 were  
497 introduced by synthesising a part of UPF1 with the desired mutations (General Biosystems, Inc) and

498 these fragments were then used to replace the original sequence. *KpnI* and *SbfI* were used as  
499 restriction sites for exchanging part of the UPF1 sequence. UPF1-GFP LF and UPF1-GFP VLLF was  
500 generated by synthesis a piece of UPF1 (from *HindIII* to *KpnI*) with the desired point mutations (General  
501 Biosystems, Inc). The *HindIII-KpnI* fragment was then introduced into the plasmid encoding UPF1-GFP  
502 iso2 digested by *HindIII* and *KpnI*. The YFP-NLS plasmids (without NES and with NES of PKI $\alpha$  and CDC7)  
503 were a kind gift from Yuh Min Chook's laboratory (Xu *et al.*, 2015). To clone UPF1's wild-type or mutant  
504 NES at the C-terminus of YFP-NLS, YFP-NLS plasmid was digested by *BamHI* and *HindIII* and purified by  
505 Wizard<sup>®</sup> SV Gel and PCR Clean-Up System (Promega). Annealed oligonucleotides encoding UPF1's NES  
506 with *HindIII* and *BamHI* overhangs at the end (UPF1-NES wt, UPF1-NES LF or UPF1-NES VLLF, listed in  
507 Table S1) are then ligated into the linearized vector.

508 pKK plasmids expressing from bidirectional, Tet responsive CMV promoter an RNAi cassette (luciferase  
509 as control or UPF1 cassette) on one side and the protein of interest (triple FLAG tagged MBP or UPF1)  
510 on the other side were designed and cloned following (Szczytny *et al.*, 2018). Each RNAi cassette  
511 contains three siRNAs which contain self-complementary regions and a loop-forming sequence from  
512 murine miRNA 155. For designing the RNAi cassette of (firefly) luciferase (*P. pyralis*, NCBI accession  
513 number M15077.1) LOCK-iT<sup>™</sup> RNAi Designer from Thermo Fisher Scientific (<https://bit.ly/3qcESry>) was  
514 used and for UPF1 RNAi cassette the already well-established siRNA targets were chosen (Paillusson  
515 *et al.*, 2005). The RNAi cassettes were synthesised (General Biosystems, Inc) and inserted into the pKK  
516 vector with the help of *ApaI* and *MfeI* restriction sites. C-terminally triple FLAG tagged MBP was  
517 inserted into pKK plasmids using InFusion cloning (Takara). To introduce C-terminally triple FLAG  
518 tagged UPF1, the pKK vector was partially digested with *NotI* and *HindIII* (since two *NotI* sites are  
519 present) and the desired vector backbone was purified via agarose gel. RNAi resistant UPF1 was  
520 obtained from cutting pcDNA3-NG-UPF1-WT-FLAG (Rufener and Muhlemann, 2013) with *NotI* and  
521 *HindIII* and cloned into the linearized vector backbone. To obtain pKK plasmids with variant UPF1 (pKK  
522 UPF1 kd + UPF1<sup>R</sup> DE, + UPF1<sup>R</sup> LF, + UPF1<sup>R</sup> RM) pieces of the wt UPF1 were replaced by the mutant ones  
523 using *HindIII* and *PmlI* restriction sites. For transient transfection of pKK plasmid in HeLa cells, the  
524 hygromycin resistance was replaced by puromycin resistance cassette.

525 For all PCR reactions, high fidelity polymerases were used (Kapa Hifi Hot Start Ready mix (Roche) or  
526 CloneAmp HiFi PCR Premix (Takara)) and sequences of plasmids were confirmed by Sanger sequencing  
527 (Microsynth, Switzerland).

528 **Cell culture and transfection.** HeLa cells and HEK293 Flp-In<sup>™</sup> T-Rex cells (Thermo Fisher Scientific)  
529 were cultured in Dulbecco's Modified Eagle Medium (DMEM) supplemented with 10% fetal bovine  
530 serum (FBS), 100 U/ml penicillin and 100  $\mu$ g/ml streptomycin (P/S) at 37 °C under 5% CO<sub>2</sub>.

531 To stably introduce pKK plasmids into HEK293 Flp-In™ T-Rex cells,  $3 \times 10^6$  cells were seeded in a 10-cm  
532 plate using DMEM plus tetracycline-free FBS. Next day, 2  $\mu\text{g}$  of the pKK plasmid and 18  $\mu\text{g}$  of pOG44  
533 Flp-Recombinase expression vector (Thermo Fisher Scientific) were transfected with the help of  
534 lipofectamine 2000 (Thermo Fisher Scientific). 24 hours after transfection, cells were transferred into  
535 T150 flasks (DMEM + tetracycline-free FBS) and 3 hours later the antibiotics are added (P/S, 100  $\mu\text{g}/\text{ml}$   
536 hygromycin B, 10  $\mu\text{g}/\text{ml}$  blasticidine). Cells were kept under selection for about two weeks.  
537 Transcription of the plasmids was induced by the addition of 1  $\mu\text{g}/\text{ml}$  doxycycline (Dox).

538 For transient transfection in HeLa cells,  $2 \times 10^5$  cells were seeded in a 6-well plate and 500 ng UPF1-  
539 GFP plasmids (wt or variants of it, for Figure 1C, 1D, 2, 3C-D, 4A) or 500 ng YFP-NLS plasmids (for Figure  
540 4B) were transfected the next day using Dogtor transfection reagent (OZ Biosciences). 24 hours later  
541 transfection efficiencies were evaluated by using fluorescence microscopy and 40'000 cells were  
542 seeded on 8-well chamber slides for fluorescence microscopy analysis the next day. Samples for  
543 Western Blotting and RNA analysis were also harvested 48 hours after transfection.

544 For transient rescue experiments in HeLa cells (Figure 5B, S3A), 1000 ng of pKK plasmids were  
545 transfected with Dogtor transfection reagent in wells of 6-well plates. The next day cells were  
546 transferred to T25 flasks and selected for 48 hours with 1.5  $\mu\text{g}/\text{ml}$  puromycin. Before analysing the  
547 experiment by immunofluorescence and RT-qPCR, cells were cultivated one additional day without  
548 puromycin.

549 **LMB treatment, detection of GFP/YFP, and fluorescence microscopy analysis.** Cells in 8-well chamber  
550 slides were incubated for 6 hours with 50 nM LMB (Cell Signaling Technology) or with ethanol as  
551 control. After washing cells with PBS twice, cells were fixed with 4 % paraformaldehyde for 25 minutes  
552 at room temperature. Next, cells were washed three times with TBS (20 mM Tris-HCl, pH 7.5, 150 mM  
553 NaCl) and incubated with TBS +/+ (TBS plus 0.5 % Triton X-100 and 6 % FBS) containing DAPI and 594-  
554 Phalloidin (Hypermol, for Figure 4B and S2B) for 1 hour at 37 °C. Finally, cells were washed three times  
555 with TBS and Vectashield mounting medium (Vector Laboratories) was added on slides to mount the  
556 coverslips. The slides were analyzed by epifluorescence microscope (Leica Microsystems, DMI6000 B)  
557 or confocal spinning disc microscopy (Nikon TI2 with Crest X-Light V2). CellProfiler software was used  
558 for quantifications of images [<https://cellprofiler.org/> (Carpenter et al., 2006)].

559 **Biochemical fractionations of HeLa cells.** HeLa cells were counted to keep  $2 \times 10^5$  cells for *whole cells*  
560 input sample.  $1 \times 10^7$  cells were spun down (500 x g, 5 min), the pellet was resuspended in cold buffer  
561 1 (50 mM HEPES, pH 7.6, 140 mM NaCl, 1 mM EDTA, 10 % glycerol, 0.5 % NP-40, 0.25 % Triton X-100  
562 and protease inhibitors) and incubated for 10 minutes on a rotating wheel in the cold room. Cells were  
563 centrifuged as before, and the supernatant was kept as *cytoplasmic fraction*. This first step was  
564 repeated twice to ensure total cell lysis. Next, the pellet was resuspended in cold buffer 2 (10 mM Tris,



565 pH 8, 200 mM NaCl, 1 mM EDTA, 0.5 mM EGTA and protease inhibitors) and incubated again 10  
566 minutes. After centrifugation, the nuclei were solubilized in cold buffer 3 (10 mM Tris, pH 8, 1 mM  
567 EDTA, 0.5 mM EGTA, 0.1 % SDS, 0.1 % deoxycholate, 1 % Triton X-100 and protease inhibitors) and  
568 sonicated briefly by tip sonication (Vibra-Cell™ 75186, 3 x 10 seconds, 45 % amplitude). Finally,  
569 samples were centrifuged (16'000 x g, 30 minutes, 4° C) and the supernatant was kept as *nuclear*  
570 *fraction*. For Western Blot analysis, proteins of the cytoplasmic and nuclear fraction (corresponding to  
571  $2 \times 10^5$  cells) were precipitated by ice-cold acetone.

572 **Co-immunoprecipitation.** For investigating interaction partners of UPF1, 12 µg of UPF1-GFP plasmid  
573 (wt or variants of it) was transfected with the transfection reagent Dogtor (OZ Biosciences) into HeLa  
574 cells seeded the day before in a 15-cm plate. 48 hours after transfection, cells were harvested, lysed  
575 in cold lysis buffer (50 mM HEPES, pH 7.3, 150 mM NaCl, 0.5 % Triton X-100 and protease inhibitors)  
576 and sonicated briefly by tip sonication (Vibra-Cell™ 75186, 3 x 10 seconds, 45 % amplitude). After  
577 centrifugation (16'000 x g, 10 min, 4° C), the supernatant was incubated with magnetic GFP-TRAP  
578 beads (Chromotek) on a rotating wheel for one hour in the cold room. After washing the beads twice  
579 on a magnet with lysis buffer, the samples were incubated with 100 µg RNase A for 10 minutes at 25  
580 °C. The samples were washed once again, and finally LDS-loading buffer was added to the beads. The  
581 samples were heated up and loaded on an SDS-PAGE.

582 **SDS-PAGE, Silver Staining and Western Blotting** was performed as described in (Contu et al., 2021).  
583 The Western blots were visualised with the Odyssey System (LICOR) and signals were quantified by  
584 Image Studio Software. For mass spectrometry, the prominent band was cut out, destained with  
585  $\text{Na}_2\text{S}_2\text{O}_3$  and  $\text{K}_3\text{Fe}(\text{CN})_6$  and then submitted to the Proteomics Mass Spectrometry Core Facility (PMSCF)  
586 of the University of Bern for tryptic in-gel digestion and mass spectrometry analysis.

587 **Antibodies for Western Blotting.** Primary antibodies were diluted in TBS containing 5% BSA or 5% milk  
588 and incubated overnight in the cold room. The following antibodies and dilutions were used: goat anti-  
589 UPF1 (1:10'000; Bethyl A300-038A;), mouse anti-GAPDH (1:10'000; Santa Cruz Biotechnology sc-  
590 47724), rabbit anti-HISTONE H3 (1:10'000; Abcam ab1791), mouse anti-TUBULIN (1:10'000; Sigma-  
591 Aldrich T9028), mouse anti-phospho-HISTONE H2A.X (Ser139) (1:1'000; Merck 05-636), mouse anti-  
592 FLAG M2 (1:2'000; Sigma-Aldrich F1803), rabbit anti-UPF2 (1:1'000; Bethyl A303-929A) rabbit anti-  
593 SMG6 (1:500; Abcam ab87539).

594 **Immunofluorescence.**  $2 - 4 \times 10^4$  HeLa or HEK 293T cells were seeded one day before analysis on an  
595 8-well chamber slides. Cells were fixed with 4 % formaldehyde in PBS for 20 minutes. After washing  
596 three times with PBS, cells were permeabilized for one hour with 0.5 % Triton X-100 and 6 % FBS in  
597 PBS and further incubated for another hour with mouse anti-FLAG M2 (1:500; Sigma-Aldrich F1803) in  
598 PBS with 0.1 % Triton X-100 and 6 % FBS (room temperature). Cells were washed three times with PBS



599 and incubated for one hour with secondary antibody (Alexa Fluor 594, chicken anti-mouse 1:1'000,  
600 Invitrogen) in PBS with 0.1 % Triton X-100 and 6 % FBS. Finally, cells were washed as above, stained  
601 with DAPI for 10 minutes, washed again and cover slip mounted by using Vectashield mounting  
602 medium (Vector Laboratories). The cells were analyzed by confocal spinning disc microscopy (Nikon  
603 TI2 with Crest X-Light V2).

604 **RNA analysis by RT-qPCR.** Total RNA was extracted using TRI-mix and precipitated with isopropanol as  
605 described in (Nicholson et al., 2012). RNA concentration was measured by Nanodrop and 1 to 3 µg of  
606 RNA was reverse transcribed with AffinityScript Multi-Temp RT (Agilent) according to the  
607 manufacturer's protocol. The cDNA was measured by qPCR using Brilliant III Ultra-Fast SYBR Green  
608 qPCR mix (Agilent) in the Rotor-Gene Q (Qiagen). The purity of RNA samples was controlled by running  
609 RT controls in each experiment. Oligonucleotides for qPCRs are listed in Table S1.

#### 610 **RNA-protein interaction studies using MicroScale Thermophoresis.**

611 *Purification of recombinant proteins.* UPF1<sup>R</sup>-3F and UPF1<sup>R</sup> RM-3F proteins were expressed in HEK293  
612 Flp-In<sup>TM</sup> T-Rex cells stably transfected with the respective pKK plasmids and purified by  
613 immunoprecipitation. Expression of the recombinant proteins was induced by addition of 1 µg/ml Dox  
614 for 48 hours. Cell pellets consisting of 5 x 10<sup>7</sup> cells were lysed in 500 µl of lysis buffer (500 mM NaCl,  
615 0.5% Triton X-100 and 50 mM Hepes pH 7.4, supplemented with protease inhibitors) and sonicated  
616 briefly by tip sonication (Vibra-Cell<sup>TM</sup> 75186, 3 x 5 sec, 45 % amplitude). After centrifugation (16'000 x  
617 g, 10 min, 4° C), the supernatant was incubated with 10 µl of Dynabeads<sup>®</sup> M-270 Epoxy beads  
618 (Invitrogen) coupled with anti-FLAG M2 antibodies on a rotating wheel for two hours at 4 °C. After  
619 washing the beads three times with 1 ml of lysis buffer, the proteins were eluted by addition of 20 µl  
620 of elution buffer (1 mg/ml 3xFLAG peptide in 1x HBS-EP+ buffer (Cytiva, BR100826)) and incubation at  
621 room temperature for 15 min. The purity of the eluted proteins was assessed by SDS-PAGE and  
622 Imperial Protein Stain (Thermo Scientific) staining. A BSA standard curve run in the same gel was used  
623 to estimate the concentration of the purified proteins.

624 *MicroScale Thermophoresis.* The RNA-binding activity of UPF1<sup>R</sup>-3F and UPF1<sup>R</sup> RM-3F was assessed using  
625 MicroScale Thermophoresis as described in (Nicholson *et al.*, 2014). The 5'-labeled Cy5 RNA U30  
626 oligonucleotide (Microsynth) was diluted to 40 nM in 1x HBS-EP+ buffer. The unlabeled recombinant  
627 proteins were serially diluted from a concentration of 200 nM down to 0.0061 nM in the presence of  
628 a constant amount of labelled RNA (20 nM). The RNA-protein mixtures were analyzed in premium  
629 capillaries using the Monolith NT.115T MST (NanoTemper Technologies). Measurements were carried  
630 out at 25 °C, with the following settings: LED power 20%, MST power 40%, laser on time 30 sec, laser  
631 off time 5 sec. The NanoTemper Technologies Analysis software, MO.Affinity Analysis v2.3, was used  
632 to determine the corresponding  $K_d$  using the  $K_d$  fit model.

633

## 634 Acknowledgments

635 We are grateful to Sutapa Chakrabarti (FU Berlin) for pointing out UPF1 residues important for RNA  
636 binding, to Lukas Gurzeler and Evan Karousis for helpful discussions throughout the entire project, to  
637 Michal Domanski for advice and help in purifying UPF1 and to Julia Schneider, Gianna Fetz and Yuh Min  
638 Chook for the UPF1-GFP, pKK puro and pEYFP plasmids, respectively. This work has been supported by  
639 the National Center of Competence in Research (NCCR) on RNA & Disease funded by the Swiss National  
640 Science Foundation (SNSF), by SNSF grants 31003A-162986 and 310030B-182831 to O.M., and by the  
641 canton of Bern (University intramural funding to O.M.).

642

## 643 References

- 644 Ajamian, L., Abel, K., Rao, S., Vyboh, K., Garcia-de-Gracia, F., Soto-Rifo, R., Kulozik, A.E., Gehring, N.H.,  
645 and Mouland, A.J. (2015). HIV-1 Recruits UPF1 but Excludes UPF2 to Promote Nucleocytoplasmic  
646 Export of the Genomic RNA. *Biomolecules* 5, 2808-2839. 10.3390/biom5042808.
- 647 Azzalin, C.M., and Lingner, J. (2006). The human RNA surveillance factor UPF1 is required for S phase  
648 progression and genome stability. *Curr Biol* 16, 433-439.
- 649 Azzalin, C.M., Reichenbach, P., Khoraiuli, L., Giulotto, E., and Lingner, J. (2007). Telomeric repeat  
650 containing RNA and RNA surveillance factors at mammalian chromosome ends. *Science* 318, 798-  
651 801. 10.1126/science.1147182.
- 652 Bhattacharya, A., Czaplinski, K., Trifillis, P., He, F., Jacobson, A., and Peltz, S.W. (2000). Characterization  
653 of the biochemical properties of the human Upf1 gene product that is involved in nonsense-  
654 mediated mRNA decay. *RNA* 6, 1226-1235.
- 655 Boehm, V., Kueckelmann, S., Gerbracht, J.V., Kallabis, S., Britto-Borges, T., Altmuller, J., Kruger, M.,  
656 Dieterich, C., and Gehring, N.H. (2021). SMG5-SMG7 authorize nonsense-mediated mRNA decay  
657 by enabling SMG6 endonucleolytic activity. *Nature communications* 12, 3965. 10.1038/s41467-  
658 021-24046-3.
- 659 Carpenter, A.E., Jones, T.R., Lamprecht, M.R., Clarke, C., Kang, I.H., Friman, O., Guertin, D.A., Chang,  
660 J.H., Lindquist, R.A., Moffat, J., et al. (2006). CellProfiler: image analysis software for identifying  
661 and quantifying cell phenotypes. *Genome Biol* 7, R100. 10.1186/gb-2006-7-10-r100.
- 662 Chakrabarti, S., Jayachandran, U., Bonneau, F., Fiorini, F., Basquin, C., Domcke, S., Le Hir, H., and Conti,  
663 E. (2011). Molecular mechanisms for the RNA-dependent ATPase activity of Upf1 and its  
664 regulation by Upf2. *Mol Cell* 41, 693-703. 10.1016/j.molcel.2011.02.010.
- 665 Chamieh, H., Ballut, L., Bonneau, F., and Le Hir, H. (2008). NMD factors UPF2 and UPF3 bridge UPF1 to  
666 the exon junction complex and stimulate its RNA helicase activity. *Nat Struct Mol Biol* 15, 85-93.
- 667 Chawla, R., Redon, S., Raftopoulou, C., Wischniewski, H., Gagos, S., and Azzalin, C.M. (2011). Human  
668 UPF1 interacts with TPP1 and telomerase and sustains telomere leading-strand replication. *EMBO*  
669 *J* 30, 4047-4058. 10.1038/emboj.2011.280.
- 670 Cheng, Z., Muhlrads, D., Lim, M.K., Parker, R., and Song, H. (2007). Structural and functional insights  
671 into the human Upf1 helicase core. *EMBO J* 26, 253-264.
- 672 Cho, H., Park, O.H., Park, J., Ryu, I., Kim, J., Ko, J., and Kim, Y.K. (2015). Glucocorticoid receptor interacts  
673 with PNRC2 in a ligand-dependent manner to recruit UPF1 for rapid mRNA degradation. *Proc Natl*  
674 *Acad Sci U S A* 112, E1540-1549. 10.1073/pnas.1409612112.
- 675 Choe, J., Ahn, S.H., and Kim, Y.K. (2014). The mRNP remodeling mediated by UPF1 promotes rapid  
676 degradation of replication-dependent histone mRNA. *Nucleic Acids Res* 42, 9334-9349.  
677 10.1093/nar/gku610.

- 678 Contu, L., Balistreri, G., Domanski, M., Uldry, A.C., and Muhlemann, O. (2021). Characterisation of the  
679 Semliki Forest Virus-host cell interactome reveals the viral capsid protein as an inhibitor of  
680 nonsense-mediated mRNA decay. *PLoS Pathog* 17, e1009603. 10.1371/journal.ppat.1009603.
- 681 Dehghani-Tafti, S., and Sanders, C.M. (2017). DNA substrate recognition and processing by the full-  
682 length human UPF1 helicase. *Nucleic Acids Res* 45, 7354-7366. 10.1093/nar/gkx478.
- 683 Durand, S., Franks, T.M., and Lykke-Andersen, J. (2016). Hyperphosphorylation amplifies UPF1 activity  
684 to resolve stalls in nonsense-mediated mRNA decay. *Nature communications* 7, 12434.  
685 10.1038/ncomms12434.
- 686 Eberle, A.B., Lykke-Andersen, S., Muhlemann, O., and Jensen, T.H. (2009). SMG6 promotes  
687 endonucleolytic cleavage of nonsense mRNA in human cells. *Nat Struct Mol Biol* 16, 49-55.  
688 10.1038/nsmb.1530.
- 689 Elbarbary, R.A., Miyoshi, K., Hedaya, O., Myers, J.R., and Maquat, L.E. (2017). UPF1 helicase promotes  
690 TSN-mediated miRNA decay. *Genes Dev* 31, 1483-1493. 10.1101/gad.303537.117.
- 691 Fiorini, F., Bagchi, D., Le Hir, H., and Croquette, V. (2015). Human Upf1 is a highly processive RNA  
692 helicase and translocase with RNP remodelling activities. *Nature communications* 6, 7581.  
693 10.1038/ncomms8581.
- 694 Fiorini, F., Boudvillain, M., and Le Hir, H. (2013). Tight intramolecular regulation of the human Upf1  
695 helicase by its N- and C-terminal domains. *Nucleic Acids Res* 41, 2404-2415. 10.1093/nar/gks1320.
- 696 Franks, T.M., Singh, G., and Lykke-Andersen, J. (2010). Upf1 ATPase-dependent mRNP disassembly is  
697 required for completion of nonsense-mediated mRNA decay. *Cell* 143, 938-950.  
698 10.1016/j.cell.2010.11.043.
- 699 Gowravaram, M., Bonneau, F., Kanaan, J., Maciej, V.D., Fiorini, F., Raj, S., Croquette, V., Le Hir, H., and  
700 Chakrabarti, S. (2018). A conserved structural element in the RNA helicase UPF1 regulates its  
701 catalytic activity in an isoform-specific manner. *Nucleic Acids Res* 46, 2648-2659.  
702 10.1093/nar/gky040.
- 703 Hein, M.Y., Hubner, N.C., Poser, I., Cox, J., Nagaraj, N., Toyoda, Y., Gak, I.A., Weisswange, I., Mansfeld,  
704 J., Buchholz, F., et al. (2015). A human interactome in three quantitative dimensions organized by  
705 stoichiometries and abundances. *Cell* 163, 712-723. 10.1016/j.cell.2015.09.053.
- 706 Hong, D., Park, T., and Jeong, S. (2019). Nuclear UPF1 Is Associated with Chromatin for Transcription-  
707 Coupled RNA Surveillance. *Mol Cells*. 10.14348/molcells.2019.0116.
- 708 Huntzinger, E., Kashima, I., Fauser, M., Sauliere, J., and Izaurralde, E. (2008). SMG6 is the catalytic  
709 endonuclease that cleaves mRNAs containing nonsense codons in metazoan. *RNA* 14, 2609-2617.  
710 10.1261/rna.1386208.
- 711 Hurt, J.A., Robertson, A.D., and Burge, C.B. (2013). Global analyses of UPF1 binding and function reveal  
712 expanded scope of nonsense-mediated mRNA decay. *Genome Res* 23, 1636-1650.  
713 10.1101/gr.157354.113.
- 714 Jankowsky, E. (2011). RNA helicases at work: binding and rearranging. *Trends Biochem Sci* 36, 19-29.  
715 10.1016/j.tibs.2010.07.008.
- 716 Karousis, E.D., Gypas, F., Zavolan, M., and Muhlemann, O. (2021). Nanopore sequencing reveals  
717 endogenous NMD-targeted isoforms in human cells. *Genome Biology* *in press*. BioRxiv preprint:  
718 <https://doi.org/10.1101/2021.04.30.442116>.
- 719 Karousis, E.D., and Muhlemann, O. (2019). Nonsense-Mediated mRNA Decay Begins Where Translation  
720 Ends. *Cold Spring Harb Perspect Biol* 11. 10.1101/cshperspect.a032862.
- 721 Kaygun, H., and Marzluff, W.F. (2005). Regulated degradation of replication-dependent histone mRNAs  
722 requires both ATR and Upf1. *Nat Struct Mol Biol* 12, 794-800. 10.1038/nsmb972.
- 723 Kazgan, N., Williams, T., Forsberg, L.J., and Brenman, J.E. (2010). Identification of a nuclear export  
724 signal in the catalytic subunit of AMP-activated protein kinase. *Mol Biol Cell* 21, 3433-3442.  
725 10.1091/mbc.E10-04-0347.
- 726 Kim, Y.K., Furic, L., Desgroseillers, L., and Maquat, L.E. (2005). Mammalian Staufen1 recruits Upf1 to  
727 specific mRNA 3'UTRs so as to elicit mRNA decay. *Cell* 120, 195-208.
- 728 Kim, Y.K., and Maquat, L.E. (2019). UPFront and center in RNA decay: UPF1 in nonsense-mediated  
729 mRNA decay and beyond. *RNA*. 10.1261/rna.070136.118.

- 730 Kosugi, S., Hasebe, M., Matsumura, N., Takashima, H., Miyamoto-Sato, E., Tomita, M., and Yanagawa,  
731 H. (2009a). Six classes of nuclear localization signals specific to different binding grooves of  
732 importin alpha. *J Biol Chem* *284*, 478-485. 10.1074/jbc.M807017200.
- 733 Kosugi, S., Hasebe, M., Tomita, M., and Yanagawa, H. (2008). Nuclear export signal consensus  
734 sequences defined using a localization-based yeast selection system. *Traffic* *9*, 2053-2062.  
735 10.1111/j.1600-0854.2008.00825.x.
- 736 Kosugi, S., Hasebe, M., Tomita, M., and Yanagawa, H. (2009b). Systematic identification of cell cycle-  
737 dependent yeast nucleocytoplasmic shuttling proteins by prediction of composite motifs. *Proc*  
738 *Natl Acad Sci U S A* *106*, 10171-10176. 10.1073/pnas.0900604106.
- 739 Kudo, N., Wolff, B., Sekimoto, T., Schreiner, E.P., Yoneda, Y., Yanagida, M., Horinouchi, S., and Yoshida,  
740 M. (1998). Leptomycin B inhibition of signal-mediated nuclear export by direct binding to CRM1.  
741 *Exp Cell Res* *242*, 540-547. 10.1006/excr.1998.4136.
- 742 Kurosaki, T., and Maquat, L.E. (2013). Rules that govern UPF1 binding to mRNA 3' UTRs. *Proc Natl Acad*  
743 *Sci U S A* *110*, 3357-3362. 10.1073/pnas.1219908110.
- 744 Kurosaki, T., Popp, M.W., and Maquat, L.E. (2019). Quality and quantity control of gene expression by  
745 nonsense-mediated mRNA decay. *Nat Rev Mol Cell Biol* *20*, 406-420. 10.1038/s41580-019-0126-  
746 2.
- 747 Lee, B.J., Cansizoglu, A.E., Suel, K.E., Louis, T.H., Zhang, Z., and Chook, Y.M. (2006). Rules for nuclear  
748 localization sequence recognition by karyopherin beta 2. *Cell* *126*, 543-558.  
749 10.1016/j.cell.2006.05.049.
- 750 Lee, S.R., Pratt, G.A., Martinez, F.J., Yeo, G.W., and Lykke-Andersen, J. (2015). Target Discrimination in  
751 Nonsense-Mediated mRNA Decay Requires Upf1 ATPase Activity. *Mol Cell* *59*, 413-425.  
752 10.1016/j.molcel.2015.06.036.
- 753 Longman, D., Jackson-Jones, K.A., Maslon, M.M., Murphy, L.C., Young, R.S., Stoddart, J.J., Hug, N.,  
754 Taylor, M.S., Papadopoulos, D.K., and Caceres, J.F. (2020). Identification of a localized nonsense-  
755 mediated decay pathway at the endoplasmic reticulum. *Genes Dev* *34*, 1075-1088.  
756 10.1101/gad.338061.120.
- 757 Lott, K., and Cingolani, G. (2011). The importin beta binding domain as a master regulator of  
758 nucleocytoplasmic transport. *Biochim Biophys Acta* *1813*, 1578-1592.  
759 10.1016/j.bbamcr.2010.10.012.
- 760 Lu, J., Wu, T., Zhang, B., Liu, S., Song, W., Qiao, J., and Ruan, H. (2021). Types of nuclear localization  
761 signals and mechanisms of protein import into the nucleus. *Cell Commun Signal* *19*, 60.  
762 10.1186/s12964-021-00741-y.
- 763 Lykke-Andersen, J., Shu, M.D., and Steitz, J.A. (2000). Human Upf proteins target an mRNA for  
764 nonsense-mediated decay when bound downstream of a termination codon. *Cell* *103*, 1121-1131.  
765 10.1016/s0092-8674(00)00214-2.
- 766 Lykke-Andersen, S., Chen, Y., Ardal, B.R., Lilje, B., Waage, J., Sandelin, A., and Jensen, T.H. (2014).  
767 Human nonsense-mediated RNA decay initiates widely by endonucleolysis and targets snoRNA  
768 host genes. *Genes Dev* *28*, 2498-2517. 10.1101/gad.246538.114.
- 769 McNally, L.M., Yee, L., and McNally, M.T. (2006). Heterogeneous nuclear ribonucleoprotein H is  
770 required for optimal U11 small nuclear ribonucleoprotein binding to a retroviral RNA-processing  
771 control element: implications for U12-dependent RNA splicing. *J Biol Chem* *281*, 2478-2488.  
772 10.1074/jbc.M511215200.
- 773 Medghalchi, S.M., Frischmeyer, P.A., Mendell, J.T., Kelly, A.G., Lawler, A.M., and Dietz, H.C. (2001).  
774 Rent1, a trans-effector of nonsense-mediated mRNA decay, is essential for mammalian embryonic  
775 viability. *Hum Mol Genet* *10*, 99-105.
- 776 Mendell, J.T., ap Rhys, C.M., and Dietz, H.C. (2002). Separable roles for rent1/hUpf1 in altered splicing  
777 and decay of nonsense transcripts. *Science* *298*, 419-422. 10.1126/science.1074428.
- 778 Mino, T., Murakawa, Y., Fukao, A., Vandenbon, A., Wessels, H.H., Ori, D., Uehata, T., Tartey, S., Akira,  
779 S., Suzuki, Y., et al. (2015). Regnase-1 and Roquin Regulate a Common Element in Inflammatory  
780 mRNAs by Spatiotemporally Distinct Mechanisms. *Cell* *161*, 1058-1073.  
781 10.1016/j.cell.2015.04.029.

- 782 Ngo, G.H.P., Grimstead, J.W., and Baird, D.M. (2021). UPF1 promotes the formation of R loops to  
783 stimulate DNA double-strand break repair. *Nature communications* 12, 3849. 10.1038/s41467-  
784 021-24201-w.
- 785 Nicholson, P., Joncourt, R., and Muhlemann, O. (2012). Analysis of nonsense-mediated mRNA decay in  
786 mammalian cells. *Curr Protoc Cell Biol Chapter 27, Unit27* 24. 10.1002/0471143030.cb2704s55.
- 787 Nicholson, P., Josi, C., Kurosawa, H., Yamashita, A., and Muhlemann, O. (2014). A novel  
788 phosphorylation-independent interaction between SMG6 and UPF1 is essential for human NMD.  
789 *Nucleic Acids Res* 42, 9217-9235. 10.1093/nar/gku645.
- 790 Okamura, M., Inose, H., and Masuda, S. (2015). RNA Export through the NPC in Eukaryotes. *Genes*  
791 (Basel) 6, 124-149. 10.3390/genes6010124.
- 792 Paillusson, A., Hirschi, N., Vallan, C., Azzalin, C.M., and Muhlemann, O. (2005). A GFP-based reporter  
793 system to monitor nonsense-mediated mRNA decay. *Nucleic Acids Res* 33, e54.
- 794 Park, E., and Maquat, L.E. (2013). Staufin-mediated mRNA decay. *Wiley Interdiscip Rev RNA* 4, 423-  
795 435. 10.1002/wrna.1168.
- 796 Park, O.H., Park, J., Yu, M., An, H.T., Ko, J., and Kim, Y.K. (2016). Identification and molecular  
797 characterization of cellular factors required for glucocorticoid receptor-mediated mRNA decay.  
798 *Genes Dev* 30, 2093-2105. 10.1101/gad.286484.116.
- 799 Rahmani, K., and Dean, D.A. (2017). Leptomycin B alters the subcellular distribution of CRM1 (Exportin  
800 1). *Biochem Biophys Res Commun* 488, 253-258. 10.1016/j.bbrc.2017.04.042.
- 801 Rufener, S.C., and Muhlemann, O. (2013). eIF4E-bound mRNPs are substrates for nonsense-mediated  
802 mRNA decay in mammalian cells. *Nature structural & molecular biology* 20, 710-717.  
803 10.1038/nsmb.2576.
- 804 Singh, A.K., Choudhury, S.R., De, S., Zhang, J., Kissane, S., Dwivedi, V., Ramanathan, P., Petric, M.,  
805 Orsini, L., Hebenstreit, D., and Brogna, S. (2019). The RNA helicase UPF1 associates with mRNAs  
806 co-transcriptionally and is required for the release of mRNAs from gene loci. *eLife* 8.  
807 10.7554/eLife.41444.
- 808 Singh, G., Pratt, G., Yeo, G.W., and Moore, M.J. (2015). The Clothes Make the mRNA: Past and Present  
809 Trends in mRNP Fashion. *Annu Rev Biochem*. 10.1146/annurev-biochem-080111-092106.
- 810 Sun, X., Perlick, H.A., Dietz, H.C., and Maquat, L.E. (1998). A mutated human homologue to yeast Upf1  
811 protein has a dominant-negative effect on the decay of nonsense-containing mRNAs in  
812 mammalian cells. *Proc Natl Acad Sci U S A* 95, 10009-10014.
- 813 Szczesny, R.J., Kowalska, K., Klosowska-Kosicka, K., Chlebowski, A., Owczarek, E.P., Warkocki, Z.,  
814 Kulinski, T.M., Adamska, D., Affek, K., Jedroszkowiak, A., et al. (2018). Versatile approach for  
815 functional analysis of human proteins and efficient stable cell line generation using FLP-mediated  
816 recombination system. *PLoS One* 13, e0194887. 10.1371/journal.pone.0194887.
- 817 Xu, D., Marquis, K., Pei, J., Fu, S.C., Cagatay, T., Grishin, N.V., and Chook, Y.M. (2015). LocNES: a  
818 computational tool for locating classical NESs in CRM1 cargo proteins. *Bioinformatics* 31, 1357-  
819 1365. 10.1093/bioinformatics/btu826.
- 820 Yamashita, A., Ohnishi, T., Kashima, I., Taya, Y., and Ohno, S. (2001). Human SMG-1, a novel  
821 phosphatidylinositol 3-kinase-related protein kinase, associates with components of the mRNA  
822 surveillance complex and is involved in the regulation of nonsense-mediated mRNA decay. *Genes*  
823 *Dev* 15, 2215-2228.
- 824 Zund, D., Gruber, A.R., Zavolan, M., and Muhlemann, O. (2013). Translation-dependent displacement  
825 of UPF1 from coding sequences causes its enrichment in 3' UTRs. *Nature structural & molecular*  
826 *biology* 20, 936-943. 10.1038/nsmb.2635.
- 827



## 828 Supplementary Information

### Supplementary Figure 1

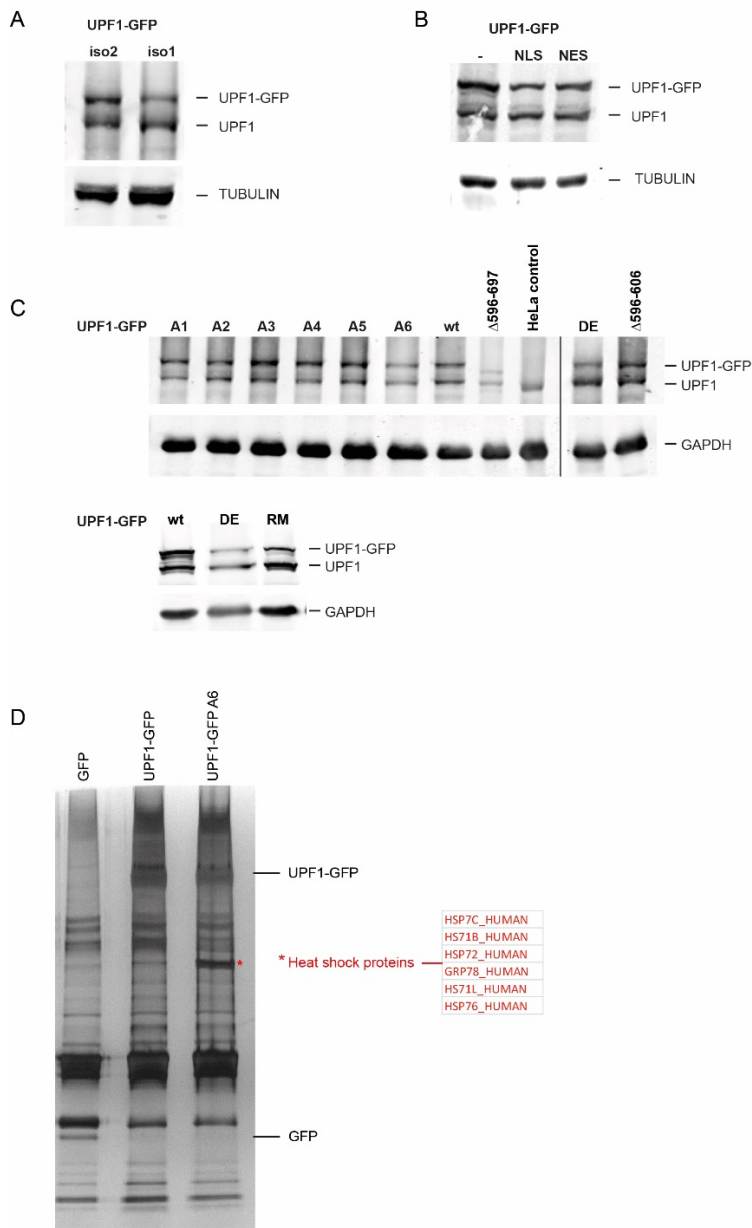

829

830 **Figure S1. A.** Expression of UPF1-GFP isoform 1 or isoform 2 in HeLa cells were controlled by probing  
831 a Western blot with anti-UPF1 antibody. Tubulin served as loading control. **B.** Immunoblotting to  
832 confirm the expression of UPF1-GFP NLS (SV40) and UPF1-GFP NES (snurportin-1) used in Fig. 1D. **C.**  
833 The expression of different UPF1-GFP constructs investigated in Figs. 2 and 3 were monitored by  
834 Western blotting as in A. GAPDH was used as loading control. **D.** Co-immunoprecipitation experiments  
835 of HeLa cells expressing GFP, UPF1-GFP or UPF1-GFP A6 were analyzed by SDS-PAGE and silver staining.  
836 Mass spectrometry of the prominent band (marked by red asterisk) appearing at 70 kDa in UPF1-GFP  
837 A6 revealed the presence of several heat shock proteins (compared to the same area in UPF1-GFP).

Supplementary Figure 2

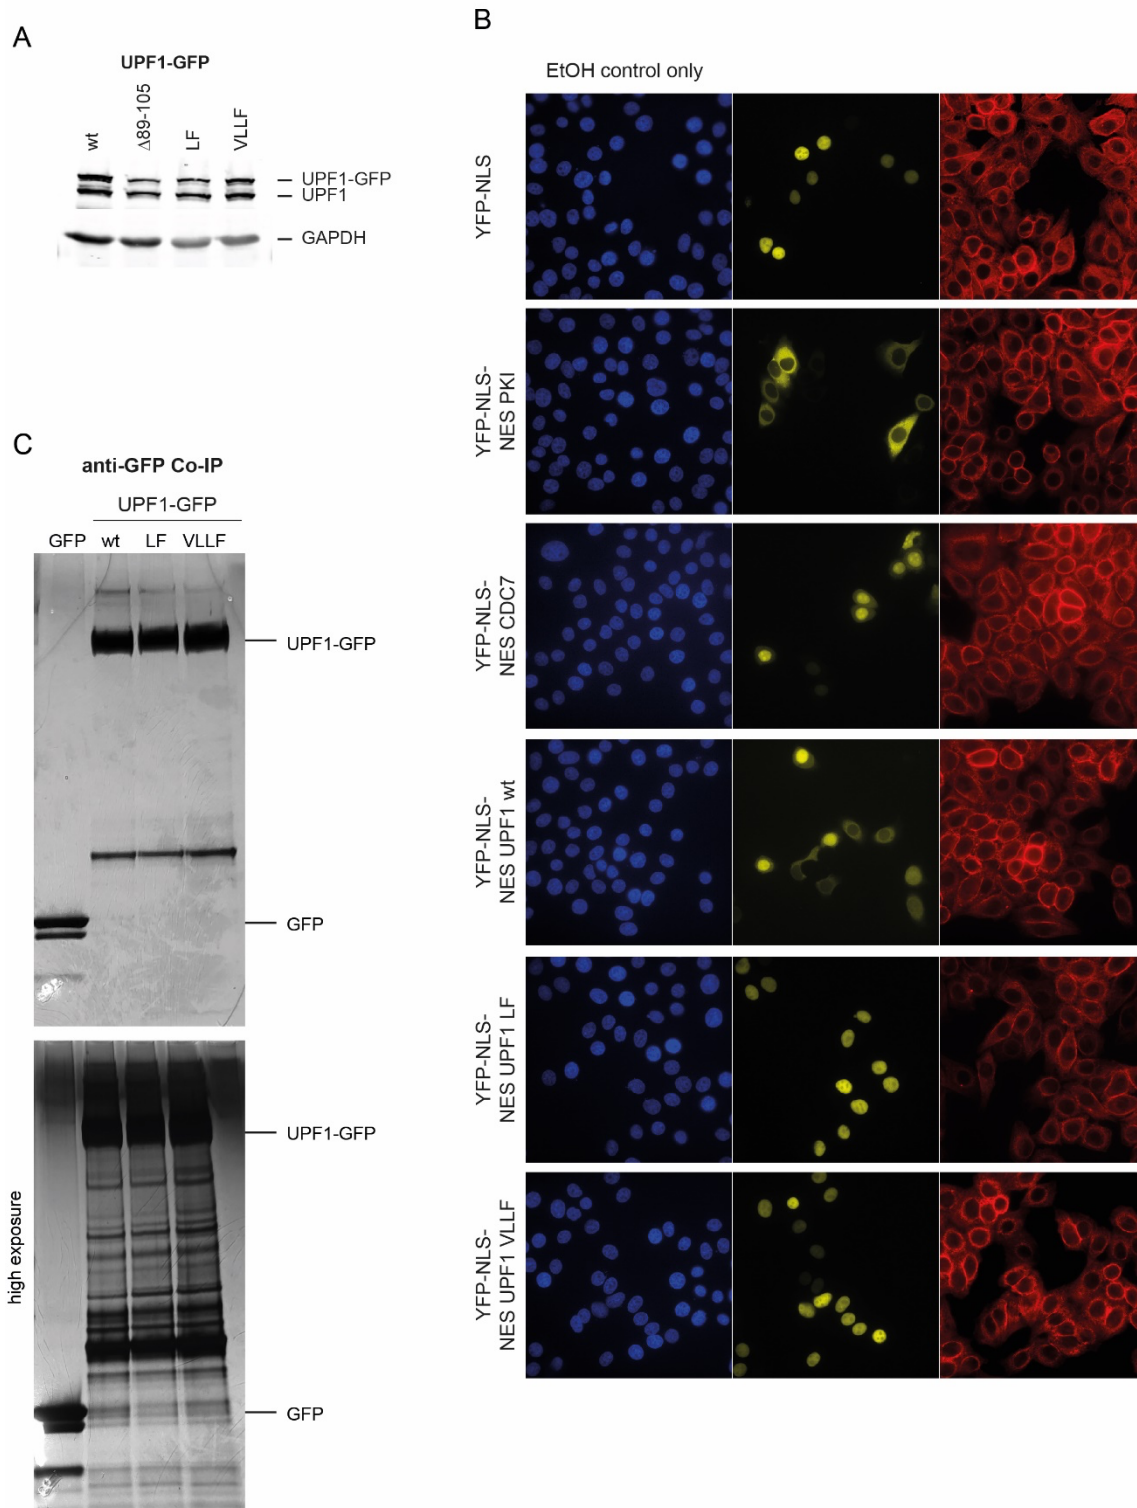

838

839 **Figure S2. A.** Immunoblotting to confirm the expression of UPF1-GFP variants used in Fig. 4 (Western  
840 blot as in Fig. S1). **B.** Pictures of confocal fluorescence microscope of the blue (DAPI), yellow (YFP-NLS),  
841 and red (Phalloidin) channels. The six different constructs are explained in the Results section and in  
842 the legend of Fig. 4B. Only the control condition (EtOH control) is shown. **C.** Co-immunoprecipitation  
843 experiments from Fig. 5A was analyzed by SDS-PAGE and silver staining.



Supplementary Figure 3

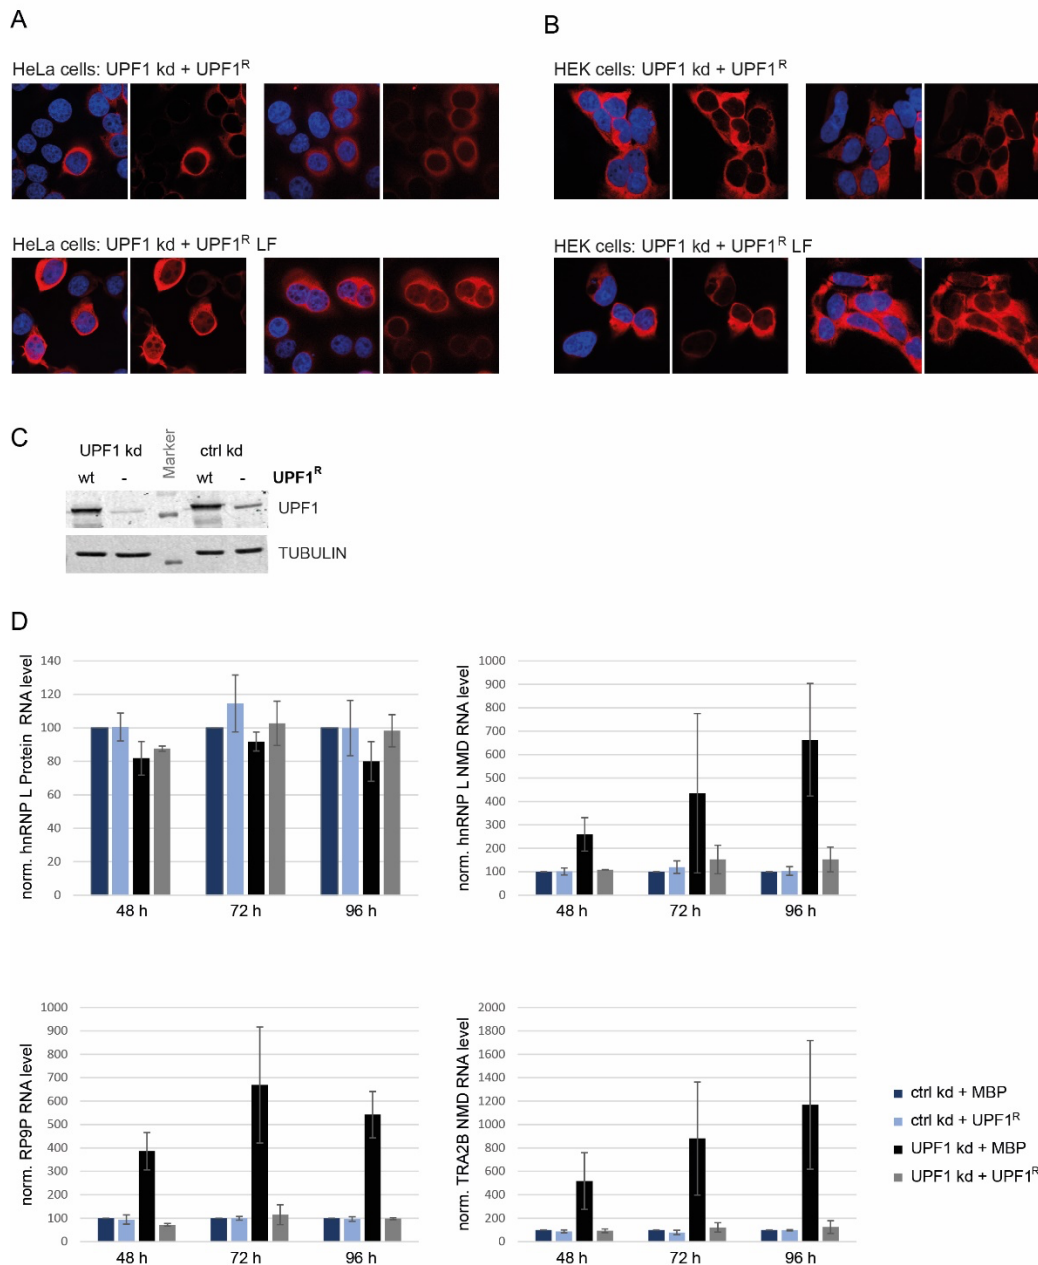

844

845 **Figure S3. A.** Immunofluorescence experiments of HeLa cells transiently expressing UPF1 wt or LF  
 846 mutant in UPF1 kd as in Fig. 5B to investigate the localization of Flag-tagged UPF1 (in red) by confocal  
 847 microscopy. DAPI was used to stain the nucleus. **B.** Immunofluorescence experiments of HEK cells  
 848 induced for 96 hours with Dox to express siRNAs against UPF1 (UPF1 kd) or against luciferase (ctrl kd)  
 849 and RNAi resistant UPF1 wt or LF mutant was analyzed as in A. **C.** UPF1 kd efficacy was assessed by  
 850 Western blotting of HEK cell lysates 96 hours after addition of Dox as in Fig. 5C. Tubulin served as  
 851 loading control. **D.** Relative levels of hnRNP L Protein, hnRNP L NMD, RP9P, and TRA2B NMD mRNAs,  
 852 normalized to actin mRNA, were analyzed by RT-qPCR in HEK cells 48, 72 or 96 hours after addition of  
 853 Dox. The different HEK cell lines are explained in the Results section and in Fig. 5C. Averages and  
 854 standard deviations of three independent experiments are shown.

855 **Table S1**

|                             | Forward (5'-3') and Reverse (5'-3') oligonucleotides                                                                                 |
|-----------------------------|--------------------------------------------------------------------------------------------------------------------------------------|
| <b>Plasmid Cloning</b>      |                                                                                                                                      |
| G16 linker                  | GGCCGGCGGAGGGGGCGGAGGAGGGGGCGGCGGAGGCGGCGGAGGGGGGA and GGCCTCCCCCTCCGCCGCCCTCCGCCCCCCCTCCTCGCCCCCTCCGCC                              |
| UPF1-GFP NLS (SV40)         | GTACAAGCCCAAGAAGAAGAGGAAGGTGGGCTAAT and CTAGATTAGCCCACCTTCTCTTCTTGGGCTT                                                              |
| UPF1-GFP NES (snurportin-1) | GTACAAGATGGAAGAGTTGAGTCAGGCCCTGGCTAGTAGCTTTTCTGTGTAAT and CTAGATTACACAGAAAAGCTACTAGCCAGGGCCTGACTCAACTCTTCCATCTT                      |
| UPF1-GFP Δ89-105            | CTGCAGAACGGGGCTGAGGAAGATGAAGAAGACAC and AGCCCCGTTTCTGCAGGATG                                                                         |
| UPF1-GFP Δ596-697           | CTGCCGACGAGAAGCGGTACCTGCAGGTCCAGTACCGGAT and ATCCGGTACTGGACCTGCAGGTACCGCTTCTCGTCGGCAG                                                |
| UPF1-GFP Δ596-606           | CGACGAGAAGCGGTACGCCCTGATGAACGCAGATGTC and GACATCTGCGTTCATCAGGGCGTACCGCTTCTCGTCG                                                      |
| UPF1-GFP RM                 | GTGTGCTCCGAGCGCCATCGCCGTGGAC and GCCTCTGCGCCGCCAGCCGTGAGGCCATC and CATCCTGTCTGTGTGCCCAACGAGCACCAAG                                   |
| UPF1-NES wt                 | AGCTTCTGTGGACGACAGTGTAGCCAAGACCAGCCAGTTGTTGGCTGAGTTGAACTTCG AGG and GATCCCTCGAAGTTCAACTCAGCCAACAACCTGGCTGGTCTTGGCTACACTGTCGTCCACA GA |
| UPF1-NES LF                 | AGCTTCTGTGGACGACAGTGTAGCCAAGACCAGCCAGTTGTTGGCTGAGGCCAACGCCG AGG and GATCCCTCGGCGTTCGCTCAGCCAACAACCTGGCTGGTCTTGGCTACACTGTCGTCCACA GA  |
| UPF1-NES VLLF               | AGCTTCTGTGGACGACAGTGCAGCCAAGACCAGCCAGTTGGCGGCTGAGGCCAACGCC GAGG and GATCCCTCGGCGTTCGCTCAGCCGCCAACCTGGCTGGTCTTGGCTGCACTGTCGTCCACA GA  |
| <b>Assays for qPCR</b>      |                                                                                                                                      |
| beta-Actin                  | TCCATCATGAAGTGTGACGT and TACTCCTGCTTGCTGATCCAC                                                                                       |
| hnRNP L Protein             | CAATCTCAGTGGACAAGGTG and CTCCATATTCTGCGGGGTGA                                                                                        |
| hnRNP L NMD                 | GGTCGCAGTGTATGTTTATG and GGCGTTTGTGGGGTTGCT                                                                                          |
| RP9P                        | CAAGCGCCTGGAGTCCTTAA and AGGAGGTTTTTCATAACTCGTGATCT                                                                                  |
| TRA2B NMD                   | TGGAATCAGAAAGCACTACGC and GAATCTTCTTGGAGCGAGA                                                                                        |

856

857 **Table S1.** Oligonucleotides (from Microsynth, Switzerland) used in the study. Termination codons are  
 858 underlined and changes to alanines are marked in red.

859
